# Supplementary material for: Structural, electronic, and gas adsorption properties of Nin (n = 1–20) atomic clusters
Source: Royal Society of Chemistry journal article supplement (doi:10.1039/d6ra01586g), 2026-04-23
Supplement: d6ra01586g1.pdf [file d6ra01586g1.pdf]

## Supporting Information for:

# Structural, Electronic, and Gas Adsorption Properties of $\text{Ni}_n$ ( $n = 1-20$ ) Atomic Clusters

Mohsen Doust Mohammadi,<sup>a</sup> Nikolaos Patsalidis,<sup>b</sup> Somnath Bhowmick,<sup>a</sup>

Vagelis A. Harmandaris,<sup>b, c, d</sup> and George Biskos<sup>\*a, e</sup>

<sup>a</sup>*Climate and Atmosphere Research Centre, The Cyprus Institute, Nicosia 2121, Cyprus*

<sup>b</sup>*Computation-based Science and Technology Research Centre, The Cyprus Institute, Nicosia 2121, Cyprus*

<sup>c</sup>*Institute of Applied and Computational Mathematics (IACM), Foundation for Research and Technology Hellas, (FORTH), IACM/FORTH, GR-71110 Heraklion, Crete, Greece*

<sup>d</sup>*Department of Mathematics and Applied Mathematics, University of Crete, GR-71409, Heraklion, Crete, Greece*

<sup>e</sup>*Faculty of Civil Engineering and Geosciences, Delft University of Technology, Delft 2628 CN, The Netherlands*

### Conceptual DFT descriptors:

The electrophilicity index ( $\omega$ ) of the  $\text{Ni}_n$  system was evaluated within the conceptual density functional theory (DFT) framework to quantify its global electron-accepting capability. Electrophilicity reflects the stabilization energy of a system when it acquires additional electronic charge from the environment. It is computed from the electronic chemical potential ( $\mu$ ) and the chemical hardness ( $\eta$ ), which are derived from frontier molecular orbital energies. In practice,  $\mu$  and  $\eta$  are approximated using the energies of the highest occupied molecular orbital ( $E_{\text{HOMO}}$ ) and the lowest unoccupied molecular orbital ( $E_{\text{LUMO}}$ ). A lower chemical potential indicates a stronger tendency to accept electrons, while higher hardness corresponds to resistance to charge transfer. The electrophilicity index combines these quantities to provide a single descriptor of reactivity, allowing comparison of electrophilic character across related systems.

$$\mu = \frac{E_{\text{HOMO}} + E_{\text{LUMO}}}{2} \quad (1)$$

$$\eta = \frac{E_{\text{LUMO}} - E_{\text{HOMO}}}{2} \quad (2)$$

$$\omega = \frac{\mu^2}{2\eta} \quad (3)$$

### Natural Population Analysis:

Natural Population Analysis (NPA) is a quantum chemical method designed to provide a physically meaningful description of electron distribution within molecules. It is based on the concept of Natural Atomic Orbitals (NAOs), which form an orthonormal set of atomic-like orbitals optimized to represent the electronic density of a molecule. The main advantage of NPA over traditional population analyses, such as Mulliken or Löwdin methods, is its reduced sensitivity to basis set choice and its ability to avoid unphysical charge delocalization.

In NPA, the one-particle density matrix  $\mathbf{P}$  is expressed in the NAO basis. Each atomic orbital is associated with a specific atom, allowing electron populations to be projected directly onto individual atoms. The electron population  $q_A$  on atom A is calculated by summing over all occupied molecular orbitals  $\phi_i$ , weighted by their projection onto the NAOs of atom A

$$q_A = \sum_i^{\text{occ}} \langle \phi_i | \hat{P}_A | \phi_i \rangle \quad (4)$$

Here,  $P_A$  represents the projection operator corresponding to the NAOs localized on atom A. This population  $q_A$  represents the total electronic density assigned to atom A. The atomic charge  $Q_A$  is then determined as the difference between the nuclear charge  $Z_A$  and the electron population:

$$Q_A = Z_A - q_A \quad (5)$$

This approach allows NPA to partition the total electron density of a molecule into contributions from each atom, providing insights into charge transfer, polarization, and electron delocalization. In addition, NPA can be extended to calculate bond orders and natural bond orbital (NBO) interactions, which quantify donor-acceptor interactions and orbital hybridization effects. NPA is widely used in computational chemistry for its accuracy in estimating atomic charges, its chemical interpretability, and its ability to support analyses of reactivity, electrophilicity, and molecular interactions. By examining the natural populations of electrons on atoms or functional groups, one can identify electron-rich and electron-deficient regions, which are critical for understanding chemical reactivity and noncovalent interactions.

**Table S1**

The values of Gupta potential including  $A_{ij}$  (eV),  $\xi_{ij}$  (eV),  $d_{ij}$ ,  $p_{ij}$ , and  $q_{ij}$

| $A_{ij}$ (eV) | $\xi_{ij}$ (eV) | $d_{ij}$ | $p_{ij}$ | $q_{ij}$ |
|---------------|-----------------|----------|----------|----------|
| 0.038         | 1.07            | 2.491    | 16.999   | 1.189    |

**Table S2**

Cartesian co-ordinates of  $Ni_n$  clusters, with  $n = 2-20$  calculated using the B3LYP-GD3BJ functional with the LANL2DZ basis set.

**Ni<sub>2</sub>**

Ni 0.000000 0.000000 2.095000  
 Ni 0.000000 0.000000 0.000000

**Ni<sub>3</sub>**

Ni -1.111041 0.641456 0.000000  
 Ni 1.111041 0.641461 0.000000  
 Ni 0.000000 -1.282917 0.000000

**Ni<sub>4</sub>**

Ni 0.614775 -1.123043 -0.666434  
 Ni 1.123052 0.614777 0.666426  
 Ni -1.123042 -0.614781 0.666433  
 Ni -0.614785 1.123048 -0.666425

**Ni<sub>5</sub>**

Ni 0.000080 0.000259 1.284785  
 Ni -0.284194 -1.142289 -0.696965  
 Ni 0.284082 1.142017 -0.697427  
 Ni -1.961952 0.165417 0.054817  
 Ni 1.961984 -0.165403 0.054791

**Ni<sub>6</sub>**

Ni 0.268405 0.001121 1.230181  
 Ni -1.723370 -1.117776 0.025388  
 Ni -1.722632 1.118086 0.024962  
 Ni 0.434440 1.166276 -0.724259  
 Ni 0.433779 -1.167311 -0.722893  
 Ni 2.309377 -0.000395 0.166621

**Ni<sub>7</sub>**

Ni 2.181224 0.805161 -0.377165  
 Ni 0.000002 1.506095 0.000006  
 Ni -2.181223 0.805166 0.377159  
 Ni 0.328839 -0.429609 -1.172175  
 Ni -0.328841 -0.429612 1.172173  
 Ni -1.799137 -1.128601 -0.671506

Ni 1.799135 -1.128600 0.671508

**Ni<sub>8</sub>**

Ni -0.771104 0.001382 1.262432  
Ni 1.250976 0.000875 -1.144027  
Ni 1.231497 2.088851 -0.031326  
Ni 1.238719 -2.085880 -0.031610  
Ni -0.882607 -1.316434 -0.548332  
Ni 1.538109 0.002100 1.021953  
Ni -0.886610 1.312885 -0.552329  
Ni -2.718981 -0.003778 0.023239

**Ni<sub>9</sub>**

Ni 1.890584 -0.395681 -0.287887  
Ni 0.058081 1.576475 -0.787727  
Ni -0.849122 -1.459626 0.922483  
Ni -0.388374 -0.879070 -1.170027  
Ni -2.015073 0.574477 1.122000  
Ni 0.400060 0.499997 1.158537  
Ni -2.085632 0.703389 -1.084708  
Ni 2.053640 1.861214 0.299590  
Ni 0.935835 -2.481176 -0.172260

**Ni<sub>10</sub>**

Ni -2.118553 0.317904 -1.045946  
Ni 2.028237 -0.353555 0.576961  
Ni -0.376127 -0.104855 1.197634  
Ni -1.601385 1.731979 0.652236  
Ni -1.718515 -1.630719 0.168593  
Ni 0.057054 -1.021984 -1.095637  
Ni 0.139380 1.416801 -0.832529  
Ni 1.984050 0.221908 -1.560343  
Ni 0.502091 -2.294031 0.776706  
Ni 1.103768 1.716552 1.162324

**Ni<sub>11</sub>**

Ni -1.748580 -1.300062 -1.283622  
Ni -2.623085 -0.325676 0.544809  
Ni -0.463031 -0.372301 1.205769  
Ni 1.302054 1.191508 0.623727  
Ni -0.745328 1.926115 1.432372  
Ni -1.301247 1.192175 -0.623960  
Ni 0.746778 1.925105 -1.432860  
Ni 2.622792 -0.327304 -0.545091  
Ni 1.747661 -1.300268 1.283863  
Ni -0.000627 -2.236234 0.000453

Ni 0.462612 -0.373059 -1.205459

**Ni<sub>12</sub>**

Ni 0.527418 0.609687 -1.125901  
Ni 1.435231 -1.213950 0.509784  
Ni 1.780623 1.607931 1.263651  
Ni -0.143039 0.322548 1.425346  
Ni -0.472344 -1.972574 1.831413  
Ni -0.785540 -1.418147 -0.488368  
Ni -2.178251 -0.507400 1.026894  
Ni -2.325956 1.330708 -0.389313  
Ni -0.266703 2.230294 0.232612  
Ni -1.468216 0.091831 -2.066968  
Ni 1.210378 -1.477885 -1.773347  
Ni 2.686398 0.396958 -0.445804

**Ni<sub>13</sub>**

Ni -1.733272 1.715992 -0.853370  
Ni 0.004548 0.351454 -1.085792  
Ni 2.253024 -1.266513 0.757406  
Ni 1.744052 1.711692 -0.842180  
Ni 0.002690 2.724070 0.362527  
Ni 1.203090 0.696389 1.140789  
Ni -0.005217 -1.564236 0.534124  
Ni 0.002379 -1.921363 -1.702895  
Ni 2.078785 -0.639329 -1.403022  
Ni -2.072278 -0.634317 -1.410713  
Ni -2.263731 -1.257872 0.749670  
Ni -0.007512 -0.616657 2.619216  
Ni -1.206557 0.700690 1.134242

**Ni<sub>14</sub>**

Ni -2.006912 0.369319 -0.000315  
Ni -1.957734 -1.672955 1.148958  
Ni -0.000161 -0.181810 -1.371744  
Ni -1.957937 -1.673333 -1.148902  
Ni -1.364780 1.608858 -1.823555  
Ni 1.365072 1.608307 -1.823506  
Ni 0.000094 2.027615 0.000282  
Ni 1.365111 1.608244 1.823792  
Ni -1.365256 1.607943 1.823693  
Ni 0.000146 -0.182098 1.371838  
Ni 1.957830 -1.673474 1.148692  
Ni 1.957636 -1.672997 -1.149254  
Ni -0.000058 -2.142834 -0.000125  
Ni 2.006951 0.369214 0.000147

**Ni<sub>15</sub>**

Ni 2.271223 1.265474 -0.000180  
Ni 2.445014 -0.395190 1.608332  
Ni 0.278973 0.177037 -1.385059  
Ni 0.144196 -1.837871 2.069161  
Ni -2.046195 -0.426936 -1.643107  
Ni -3.453346 0.273546 0.023752  
Ni 0.146245 2.645687 1.066824  
Ni 0.361962 2.536498 -1.171027  
Ni 2.476097 -0.397841 -1.565058  
Ni 1.374813 -1.628551 0.023785  
Ni -1.957360 -0.311467 1.695044  
Ni -1.058399 -1.563466 0.052624  
Ni 0.094365 -2.004565 -1.959990  
Ni 0.284660 0.300104 1.310897  
Ni -1.362248 1.367539 -0.125999

**Ni<sub>16</sub>**

Ni 1.187327 -0.507374 -1.978577  
Ni 1.495239 2.119496 0.673418  
Ni 2.689014 0.875341 -0.853254  
Ni -1.624242 -0.500040 1.921694  
Ni -1.766071 2.133388 -1.180953  
Ni -2.814049 0.181591 0.055594  
Ni 0.510295 1.772334 -1.420031  
Ni -0.375711 -2.225854 -2.101827  
Ni 0.293455 -1.869816 2.027375  
Ni 0.152876 0.027418 0.216048  
Ni 0.447986 0.718808 2.528762  
Ni -1.042598 1.768608 0.960667  
Ni 1.114135 -2.053707 -0.290498  
Ni -1.356865 -1.797710 0.092370  
Ni -1.184830 -0.052515 -1.715426  
Ni 2.274038 -0.589968 1.064638

**Ni<sub>17</sub>**

Ni -1.877833 -0.376589 2.274201  
Ni 0.434943 2.891457 -0.000021  
Ni -1.877657 -0.376698 -2.274284  
Ni 1.393421 1.536031 -2.007864  
Ni -1.514162 -0.644718 -0.000026  
Ni -0.773750 -2.524487 1.235242  
Ni -0.923467 1.525996 1.336632  
Ni 1.393223 1.536064 2.007962  
Ni -0.773716 -2.524470 -1.235260

Ni -2.761405 1.267598 -0.000139  
Ni 0.936216 0.595783 0.000041  
Ni 1.153343 -1.982339 0.000020  
Ni 2.677045 -0.621968 1.165387  
Ni -0.923344 1.525959 -1.336743  
Ni 0.379912 -0.602837 1.922676  
Ni 0.380089 -0.602853 -1.922646  
Ni 2.677143 -0.621928 -1.165177

### **Ni<sub>18</sub>**

Ni -1.950066 2.265872 -0.232354  
Ni -1.721111 1.097569 2.221153  
Ni -1.869565 -1.884564 1.486697  
Ni -1.989540 -1.834775 -1.134393  
Ni -1.753268 0.601603 -2.176411  
Ni -2.171460 0.017990 0.260164  
Ni 0.040060 1.924492 0.986900  
Ni -0.027774 -0.510693 2.053458  
Ni -0.048029 -2.250992 0.099695  
Ni -0.012999 -1.089237 -2.288643  
Ni 0.045058 1.883845 -1.508292  
Ni 0.003609 -0.031797 -0.295121  
Ni 1.742366 1.009905 2.243838  
Ni 1.774625 -1.942933 1.504141  
Ni 1.922437 -1.915284 -1.111715  
Ni 1.795758 0.528165 -2.162667  
Ni 2.045808 2.192329 -0.222152  
Ni 2.174091 -0.061493 0.275703

### **Ni<sub>19</sub>**

Ni 0.000190 -0.000118 0.000344  
Ni -1.820360 1.735743 -0.006335  
Ni -1.824625 -1.731853 0.007773  
Ni 1.819571 -1.740200 0.011582  
Ni 1.823948 1.735918 -0.013500  
Ni -3.384202 0.004525 0.002632  
Ni -0.008350 -3.253005 0.018353  
Ni 3.383124 -0.004490 -0.001776  
Ni 0.001447 3.252588 -0.018512  
Ni -1.820401 0.014990 1.737365  
Ni 1.823020 0.005218 1.732324  
Ni 0.007337 1.677199 1.657915  
Ni -0.005505 -1.658623 1.676905  
Ni 0.006149 0.018827 3.251621  
Ni -1.822813 -0.011086 -1.736191  
Ni 1.821000 -0.009084 -1.734387

Ni -0.003283 1.657972 -1.676490  
 Ni 0.002052 -1.677009 -1.657689  
 Ni 0.001700 -0.017514 -3.251932

**Ni<sub>20</sub>**

Ni 1.415878 2.297656 -0.177699  
 Ni 2.600836 -2.287271 -0.906923  
 Ni -1.586488 -2.664602 0.883050  
 Ni 2.633808 -1.337859 1.198477  
 Ni -0.830109 2.606765 -1.361247  
 Ni 1.423914 1.334279 -2.320816  
 Ni -1.403070 -1.566796 -1.213436  
 Ni 0.108903 -1.560228 2.467027  
 Ni -3.357178 -1.026446 -0.135405  
 Ni -0.985583 0.067468 -2.837032  
 Ni 0.990825 2.579935 2.087014  
 Ni 0.499936 -1.733385 0.265961  
 Ni 1.013781 0.422437 1.393763  
 Ni 2.376091 0.094256 -0.583947  
 Ni -1.553679 -0.382673 1.102738  
 Ni -0.092305 0.524958 -0.813529  
 Ni -0.992773 2.005109 0.922656  
 Ni -0.689153 0.901530 2.928748  
 Ni 0.854908 -1.247532 -2.097659  
 Ni -2.428543 0.972398 -0.801742

**Table S3**

Zero-point energies (ZPE, in eV) and ZPE-corrected electronic energies (EE, in eV) for the various structural isomers of neutral nickel clusters Ni<sub>*n*</sub> (*n* = 1–20). For each *n*, individual isomers are labeled using the suffix “\_01”, “\_02”, and so on. All calculations were performed using the B3LYP-GD3BJ functional with the LANL2DZ basis set.

| <b>Systems</b> | <b>ZPE (eV)</b> | <b>EE (eV)</b> |
|----------------|-----------------|----------------|
| <b>Ni01</b>    |                 | -4614.2171     |
| <b>Ni02</b>    | 0.021845        | -9231.3679     |
| <b>Ni03</b>    | 0.050317        | -13848.964     |
| <b>Ni04_01</b> | 0.075216        | -18465.886     |
| <b>Ni04_03</b> | 0.075244        | -18465.886     |
| <b>Ni04_02</b> | 0.081707        | -18465.718     |
| <b>Ni05_01</b> | 0.103252        | -23083.182     |
| <b>Ni05_02</b> | 0.109661        | -23082.914     |
| <b>Ni06_01</b> | 0.144897        | -27700.716     |
| <b>Ni06_02</b> | 0.137179        | -27700.569     |
| <b>Ni06_03</b> | 0.14686         | -27700.511     |

---

|         |          |            |
|---------|----------|------------|
| Ni07_01 | 0.175551 | -32318.335 |
| Ni07_03 | 0.175087 | -32318.302 |
| Ni07_02 | 0.169605 | -32318.224 |
| Ni07_04 | 0.16126  | -32318.145 |

---

|         |          |            |
|---------|----------|------------|
| Ni08_05 | 0.233995 | -36936.084 |
| Ni08_09 | 0.232222 | -36936.082 |
| Ni08_06 | 0.266721 | -36936.015 |
| Ni08_08 | 0.207514 | -36936.001 |
| Ni08_07 | 0.197914 | -36935.916 |
| Ni08_04 | 0.201132 | -36935.914 |
| Ni08_12 | 0.230177 | -36935.866 |
| Ni08_03 | 0.194205 | -36935.863 |
| Ni08_01 | 0.199496 | -36935.846 |
| Ni08_13 | 0.197150 | -36935.842 |
| Ni08_10 | 0.235958 | -36935.649 |
| Ni08_11 | 0.219568 | -36935.625 |
| Ni08_02 | 0.249049 | -36935.561 |

---

|         |          |            |
|---------|----------|------------|
| Ni09_06 | 0.254967 | -41553.952 |
| Ni09_04 | 0.255622 | -41553.951 |
| Ni09_03 | 0.305911 | -41553.892 |
| Ni09_02 | 0.250576 | -41553.817 |
| Ni09_01 | 0.232522 | -41553.801 |
| Ni09_13 | 0.232658 | -41553.801 |
| Ni09_09 | 0.222922 | -41553.781 |
| Ni09_05 | 0.245749 | -41553.762 |
| Ni09_12 | 0.252758 | -41553.728 |
| Ni09_14 | 0.246758 | -41553.694 |
| Ni09_10 | 0.243758 | -41553.691 |
| Ni09_07 | 0.234513 | -41553.635 |
| Ni09_11 | 0.237867 | -41553.609 |
| Ni09_08 | 0.263258 | -41553.541 |

---

|         |          |            |
|---------|----------|------------|
| Ni10_02 | 0.274603 | -46171.804 |
| Ni10_05 | 0.288894 | -46171.803 |
| Ni10_08 | 0.314147 | -46171.714 |
| Ni10_15 | 0.282594 | -46171.703 |
| Ni10_17 | 0.338447 | -46171.703 |
| Ni10_20 | 0.297048 | -46171.700 |
| Ni10_11 | 0.299339 | -46171.688 |
| Ni10_09 | 0.268958 | -46171.571 |
| Ni10_01 | 0.267349 | -46171.565 |
| Ni10_06 | 0.267649 | -46171.565 |
| Ni10_12 | 0.263803 | -46171.546 |
| Ni10_14 | 0.263912 | -46171.546 |

|         |          |            |
|---------|----------|------------|
| Ni10_16 | 0.274712 | -46171.531 |
| Ni10_23 | 0.307629 | -46171.505 |
| Ni10_18 | 0.298275 | -46171.500 |
| Ni10_03 | 0.274439 | -46171.466 |
| Ni10_19 | 0.284748 | -46171.441 |
| Ni10_13 | 0.276048 | -46171.435 |
| Ni10_10 | 0.268112 | -46171.411 |
| Ni10_22 | 0.265330 | -46171.397 |
| Ni10_21 | 0.281857 | -46171.200 |
| Ni10_07 | 0.327784 | -46171.077 |
| Ni10_04 | 0.286548 | -46170.784 |
| <hr/>   |          |            |
| Ni11_12 | 0.306348 | -50789.804 |
| Ni11_04 | 0.332665 | -50789.747 |
| Ni11_02 | 0.318184 | -50789.677 |
| Ni11_01 | 0.308911 | -50789.619 |
| Ni11_18 | 0.300811 | -50789.602 |
| Ni11_07 | 0.341229 | -50789.589 |
| Ni11_09 | 0.361465 | -50789.512 |
| Ni11_14 | 0.327593 | -50789.501 |
| Ni11_06 | 0.298957 | -50789.408 |
| Ni11_05 | 0.339892 | -50789.396 |
| Ni11_03 | 0.301111 | -50789.386 |
| Ni11_13 | 0.306157 | -50789.341 |
| Ni11_15 | 0.303757 | -50789.159 |
| Ni11_08 | 0.303320 | -50789.135 |
| Ni11_17 | 0.366674 | -50789.12  |
| Ni11_10 | 0.309348 | -50788.974 |
| Ni11_16 | 0.302066 | -50788.941 |
| Ni11_11 | 0.299584 | -50788.743 |
| <hr/>   |          |            |
| Ni12_12 | 0.338256 | -55407.721 |
| Ni12_01 | 0.372510 | -55407.578 |
| Ni12_03 | 0.341829 | -55407.547 |
| Ni12_07 | 0.329393 | -55407.529 |
| Ni12_17 | 0.328847 | -55407.507 |
| Ni12_14 | 0.355792 | -55407.466 |
| Ni12_09 | 0.323011 | -55407.464 |
| Ni12_10 | 0.337765 | -55407.450 |
| Ni12_02 | 0.351292 | -55407.440 |
| Ni12_22 | 0.344201 | -55407.439 |
| Ni12_16 | 0.364328 | -55407.419 |
| Ni12_25 | 0.336729 | -55407.381 |
| Ni12_05 | 0.337411 | -55407.337 |
| Ni12_13 | 0.380391 | -55407.269 |

|         |          |            |
|---------|----------|------------|
| Ni12_24 | 0.359583 | -55407.263 |
| Ni12_06 | 0.338256 | -55407.261 |
| Ni12_23 | 0.344938 | -55407.256 |
| Ni12_21 | 0.373492 | -55407.162 |
| Ni12_11 | 0.367437 | -55407.064 |
| Ni12_18 | 0.366237 | -55407.005 |
| Ni12_15 | 0.365855 | -55406.881 |
| Ni12_04 | 0.333620 | -55406.753 |
| Ni12_19 | 0.370655 | -55406.239 |
| Ni12_20 | 0.329311 | -55406.236 |
| Ni12_08 | 0.408209 | -55406.170 |
| <hr/>   |          |            |
| Ni13_02 | 0.367110 | -60025.684 |
| Ni13_22 | 0.366237 | -60025.631 |
| Ni13_05 | 0.390291 | -60025.611 |
| Ni13_16 | 0.372919 | -60025.604 |
| Ni13_15 | 0.376955 | -60025.59  |
| Ni13_08 | 0.369619 | -60025.557 |
| Ni13_20 | 0.370628 | -60025.516 |
| Ni13_18 | 0.365337 | -60025.513 |
| Ni13_14 | 0.372619 | -60025.462 |
| Ni13_21 | 0.380255 | -60025.399 |
| Ni13_07 | 0.400955 | -60025.368 |
| Ni13_17 | 0.530497 | -60025.364 |
| Ni13_13 | 0.393182 | -60025.343 |
| Ni13_11 | 0.370846 | -60025.342 |
| Ni13_01 | 0.373901 | -60025.312 |
| Ni13_09 | 0.392091 | -60025.273 |
| Ni13_03 | 0.376001 | -60025.244 |
| Ni13_12 | 0.448517 | -60025.235 |
| Ni13_04 | 0.396046 | -60025.176 |
| Ni13_19 | 0.379301 | -60025.048 |
| Ni13_10 | 0.379791 | -60024.823 |
| Ni13_06 | 0.372701 | -60024.714 |
| <hr/>   |          |            |
| Ni14_20 | 0.402155 | -64643.706 |
| Ni14_21 | 0.402755 | -64643.656 |
| Ni14_07 | 0.411782 | -64643.481 |
| Ni14_24 | 0.403873 | -64643.477 |
| Ni14_25 | 0.426999 | -64643.475 |
| Ni14_22 | 0.412709 | -64643.407 |
| Ni14_18 | 0.429072 | -64643.361 |
| Ni14_06 | 0.402591 | -64643.360 |
| Ni14_17 | 0.402182 | -64643.326 |
| Ni14_14 | 0.420972 | -64643.298 |

|         |          |            |
|---------|----------|------------|
| Ni14_03 | 0.409245 | -64643.256 |
| Ni14_05 | 0.494634 | -64643.198 |
| Ni14_19 | 0.435481 | -64643.150 |
| Ni14_11 | 0.406164 | -64643.120 |
| Ni14_13 | 0.403245 | -64643.088 |
| Ni14_10 | 0.409627 | -64643.077 |
| Ni14_16 | 0.454599 | -64643.000 |
| Ni14_02 | 0.395800 | -64642.965 |
| Ni14_04 | 0.428499 | -64642.884 |
| Ni14_12 | 0.395746 | -64642.872 |
| Ni14_01 | 0.392282 | -64642.802 |
| Ni14_08 | 0.392773 | -64642.727 |
| Ni14_09 | 0.407173 | -64642.654 |
| Ni14_15 | 0.427572 | -64642.511 |
| Ni14_23 | 0.430845 | -64641.974 |
| <hr/>   |          |            |
| Ni15_06 | 0.486807 | -69261.431 |
| Ni15_02 | 0.436299 | -69261.369 |
| Ni15_10 | 0.436899 | -69261.360 |
| Ni15_12 | 0.421518 | -69261.358 |
| Ni15_14 | 0.455117 | -69261.307 |
| Ni15_11 | 0.470253 | -69261.276 |
| Ni15_19 | 0.489671 | -69261.275 |
| Ni15_01 | 0.451408 | -69261.166 |
| Ni15_07 | 0.451599 | -69261.136 |
| Ni15_15 | 0.427245 | -69261.070 |
| Ni15_03 | 0.522725 | -69261.063 |
| Ni15_09 | 0.433599 | -69260.946 |
| Ni15_16 | 0.427709 | -69260.690 |
| Ni15_13 | 0.478353 | -69260.665 |
| Ni15_04 | 0.425172 | -69260.578 |
| Ni15_08 | 0.446663 | -69260.535 |
| Ni15_05 | 0.444399 | -69260.527 |
| Ni15_17 | 0.450563 | -69260.016 |
| Ni15_18 | 0.436463 | -69259.537 |
| <hr/>   |          |            |
| Ni16_03 | 0.575496 | -73879.350 |
| Ni16_04 | 0.485607 | -73879.346 |
| Ni16_09 | 0.537397 | -73879.345 |
| Ni16_05 | 0.467335 | -73879.301 |
| Ni16_10 | 0.554088 | -73879.291 |
| Ni16_08 | 0.466844 | -73879.279 |
| Ni16_12 | 0.559160 | -73879.251 |
| Ni16_11 | 0.511434 | -73879.226 |
| Ni16_13 | 0.489344 | -73879.190 |

|         |          |            |
|---------|----------|------------|
| Ni16_06 | 0.550624 | -73879.152 |
| Ni16_07 | 0.525561 | -73879.105 |
| Ni16_01 | 0.699584 | -73878.872 |
| <hr/>   |          |            |
| Ni17_10 | 0.516779 | -78497.772 |
| Ni17_16 | 0.516288 | -78497.771 |
| Ni17_04 | 0.515879 | -78497.631 |
| Ni17_01 | 0.514434 | -78497.553 |
| Ni17_11 | 0.556242 | -78497.300 |
| Ni17_06 | 0.492043 | -78497.266 |
| Ni17_07 | 0.492207 | -78497.265 |
| Ni17_05 | 0.515034 | -78497.262 |
| Ni17_09 | 0.544870 | -78497.257 |
| Ni17_14 | 0.544815 | -78497.253 |
| Ni17_19 | 0.515607 | -78497.227 |
| Ni17_20 | 0.495398 | -78497.141 |
| Ni17_02 | 0.489044 | -78497.141 |
| Ni17_08 | 0.593578 | -78497.085 |
| Ni17_18 | 0.488853 | -78497.020 |
| Ni17_17 | 0.505625 | -78496.980 |
| Ni17_12 | 0.578878 | -78496.960 |
| Ni17_15 | 0.629849 | -78496.835 |
| Ni17_03 | 0.629577 | -78496.809 |
| Ni17_13 | 0.805755 | -78496.070 |
| <hr/>   |          |            |
| Ni18_07 | 0.616377 | -83115.650 |
| Ni18_05 | 0.524961 | -83115.513 |
| Ni18_02 | 0.571978 | -83115.471 |
| Ni18_01 | 0.651940 | -83115.278 |
| Ni18_04 | 0.689521 | -83115.219 |
| Ni18_09 | 0.595050 | -83115.102 |
| Ni18_03 | 0.567560 | -83115.033 |
| Ni18_10 | 0.707384 | -83114.669 |
| Ni18_06 | 0.597532 | -83114.328 |
| Ni18_08 | 0.591396 | -83114.175 |
| <hr/>   |          |            |
| Ni19_08 | 0.578932 | -87734.637 |
| Ni19_05 | 0.574733 | -87733.861 |
| Ni19_04 | 0.634649 | -87733.855 |
| Ni19_01 | 0.638195 | -87733.628 |
| Ni19_07 | 0.617413 | -87733.578 |
| Ni19_09 | 0.659194 | -87733.100 |
| Ni19_02 | 0.572305 | -87732.914 |
| Ni19_10 | 0.675667 | -87732.816 |
| Ni19_03 | 0.646322 | -87732.717 |
| Ni19_06 | 0.580841 | -87731.777 |

|                |          |            |
|----------------|----------|------------|
| <b>Ni20_08</b> | 0.598814 | -92351.575 |
| <b>Ni20_01</b> | 0.598568 | -92351.575 |
| <b>Ni20_07</b> | 0.685348 | -92351.346 |
| <b>Ni20_10</b> | 0.713820 | -92351.332 |
| <b>Ni20_06</b> | 0.691675 | -92351.217 |
| <b>Ni20_04</b> | 0.653876 | -92351.177 |
| <b>Ni20_09</b> | 0.701957 | -92351.064 |
| <b>Ni20_02</b> | 0.756583 | -92350.847 |
| <b>Ni20_05</b> | 0.806791 | -92350.670 |
| <b>Ni20_03</b> | 0.638604 | -92348.512 |

**Table S4**

The average bond length values in Å for global minimum structures of Ni<sub>n</sub> (*n* = 2-20). All values are calculated at the B3LYP-GD3BJ/LAN12DZ level of theory.

| <b>Systems</b>         | <b>Average Bond Length</b> |
|------------------------|----------------------------|
| <b>Ni<sub>2</sub></b>  | 2.095                      |
| <b>Ni<sub>3</sub></b>  | 2.222                      |
| <b>Ni<sub>4</sub></b>  | 2.352                      |
| <b>Ni<sub>5</sub></b>  | 2.360                      |
| <b>Ni<sub>6</sub></b>  | 2.357                      |
| <b>Ni<sub>7</sub></b>  | 2.335                      |
| <b>Ni<sub>8</sub></b>  | 2.364                      |
| <b>Ni<sub>9</sub></b>  | 2.407                      |
| <b>Ni<sub>10</sub></b> | 2.441                      |
| <b>Ni<sub>11</sub></b> | 2.432                      |
| <b>Ni<sub>12</sub></b> | 2.411                      |
| <b>Ni<sub>13</sub></b> | 2.454                      |
| <b>Ni<sub>14</sub></b> | 2.414                      |
| <b>Ni<sub>15</sub></b> | 2.452                      |
| <b>Ni<sub>16</sub></b> | 2.467                      |
| <b>Ni<sub>17</sub></b> | 2.467                      |
| <b>Ni<sub>18</sub></b> | 2.452                      |
| <b>Ni<sub>19</sub></b> | 2.413                      |
| <b>Ni<sub>20</sub></b> | 2.466                      |

**Table S5**

Values of Cohesive energy per atom (eV), first and second dissociation energy ( $D_{e,1}$  and  $D_{e,2}$ ) in eV of the global minimum structure of  $Ni_n$  clusters, where  $n = 2-20$ . All values are obtained from electronic energy at the B3LYP-GD3BJ/LAN12DZ level of theory. The calculated cohesive energies are compared with those reported by Chibani et al.

| <b>Systems</b>         | <b><math>E_{Coh}</math></b> | <b><math>E_{Coh}(\text{Chibani})</math></b> | <b><math>D_{e,1}</math></b> | <b><math>D_{e,2}</math></b> |
|------------------------|-----------------------------|---------------------------------------------|-----------------------------|-----------------------------|
| <b>Ni<sub>2</sub></b>  | 1.478                       | 1.538                                       | 2.956                       | -                           |
| <b>Ni<sub>3</sub></b>  | 2.121                       | 1.975                                       | 3.407                       | 3.407                       |
| <b>Ni<sub>4</sub></b>  | 2.273                       | 2.311                                       | 2.730                       | 3.182                       |
| <b>Ni<sub>5</sub></b>  | 2.440                       | 2.578                                       | 3.106                       | 2.881                       |
| <b>Ni<sub>6</sub></b>  | 2.593                       | 2.806                                       | 3.359                       | 3.510                       |
| <b>Ni<sub>7</sub></b>  | 2.713                       | 2.912                                       | 3.433                       | 3.836                       |
| <b>Ni<sub>8</sub></b>  | 2.823                       | 2.991                                       | 3.591                       | 4.068                       |
| <b>Ni<sub>9</sub></b>  | 2.917                       | 3.101                                       | 3.671                       | 4.306                       |
| <b>Ni<sub>10</sub></b> | 2.991                       | 3.167                                       | 3.670                       | 4.386                       |
| <b>Ni<sub>11</sub></b> | 3.066                       | 3.212                                       | 3.799                       | 4.514                       |
| <b>Ni<sub>12</sub></b> | 3.121                       | 3.259                                       | 3.733                       | 4.576                       |
| <b>Ni<sub>13</sub></b> | 3.171                       | 3.285                                       | 3.775                       | 4.552                       |
| <b>Ni<sub>14</sub></b> | 3.219                       | 3.378                                       | 3.839                       | 4.658                       |
| <b>Ni<sub>15</sub></b> | 3.244                       | 3.433                                       | 3.593                       | 4.477                       |
| <b>Ni<sub>16</sub></b> | 3.276                       | -                                           | 3.751                       | 4.388                       |
| <b>Ni<sub>17</sub></b> | 3.329                       | -                                           | 4.186                       | 4.981                       |
| <b>Ni<sub>18</sub></b> | 3.353                       | -                                           | 3.761                       | 4.991                       |
| <b>Ni<sub>19</sub></b> | 3.426                       | -                                           | 4.732                       | 5.538                       |
| <b>Ni<sub>20</sub></b> | 3.392                       | -                                           | 2.741                       | 4.518                       |

**Table S6**

The values of HOMO energy ( $\epsilon_{\text{HOMO}}$ ) in eV, LUMO energy ( $\epsilon_{\text{LUMO}}$ ) in eV, HOMO-LUMO energy gap (HLG) in eV, chemical hardness ( $\eta$ ) in eV, chemical potential ( $\mu$ ) in eV, and electrophilicity index ( $\omega$ ) in eV for the most stable isomers of neutral Nickel atomic clusters,  $\text{Ni}_n$  ( $n = 1-20$ ). All values are calculated at the B3LYP-GD3BJ/LAN12DZ level of theory

| Systems          | $\epsilon_{\text{HOMO}}$ (eV) | $\epsilon_{\text{LUMO}}$ (eV) | HLG (eV) | $\mu$ (eV) | $\eta$ (eV) | $\omega$ (eV) |
|------------------|-------------------------------|-------------------------------|----------|------------|-------------|---------------|
| Ni <sub>1</sub>  | -4.8825                       | -3.2411                       | 1.6414   | -4.0618    | 0.8207      | 10.0513       |
| Ni <sub>2</sub>  | -5.4001                       | -3.3522                       | 2.0479   | -4.3761    | 1.0240      | 9.3507        |
| Ni <sub>3</sub>  | -4.4504                       | -2.2439                       | 2.2066   | -3.3471    | 1.1033      | 5.0771        |
| Ni <sub>4</sub>  | -3.9141                       | -2.2082                       | 1.7059   | -3.0611    | 0.8529      | 5.4932        |
| Ni <sub>5</sub>  | -4.4107                       | -2.8346                       | 1.5761   | -3.6227    | 0.7880      | 8.3274        |
| Ni <sub>6</sub>  | -4.7680                       | -3.0210                       | 1.7470   | -3.8945    | 0.8735      | 8.6818        |
| Ni <sub>7</sub>  | -4.4583                       | -2.8768                       | 1.5815   | -3.6676    | 0.7908      | 8.5049        |
| Ni <sub>8</sub>  | -4.8643                       | -3.2776                       | 1.5867   | -4.0710    | 0.7933      | 10.4456       |
| Ni <sub>9</sub>  | -4.7998                       | -3.3173                       | 1.4825   | -4.0586    | 0.7412      | 11.1119       |
| Ni <sub>10</sub> | -4.7985                       | -3.2251                       | 1.5734   | -4.0118    | 0.7867      | 10.2291       |
| Ni <sub>11</sub> | -4.7917                       | -3.3500                       | 1.4417   | -4.0708    | 0.7208      | 11.4952       |
| Ni <sub>12</sub> | -4.8502                       | -3.3933                       | 1.4569   | -4.1217    | 0.7284      | 11.6615       |
| Ni <sub>13</sub> | -4.7538                       | -3.3601                       | 1.3938   | -4.0569    | 0.6969      | 11.8083       |
| Ni <sub>14</sub> | -4.6817                       | -3.3356                       | 1.3461   | -4.0086    | 0.6731      | 11.9365       |
| Ni <sub>15</sub> | -4.7100                       | -3.2888                       | 1.4213   | -3.9994    | 0.7106      | 11.2547       |
| Ni <sub>16</sub> | -4.5707                       | -3.3108                       | 1.2599   | -3.9408    | 0.6299      | 12.3273       |
| Ni <sub>17</sub> | -4.5838                       | -3.2665                       | 1.3173   | -3.9251    | 0.6587      | 11.6946       |
| Ni <sub>18</sub> | -4.6488                       | -3.4001                       | 1.2487   | -4.0244    | 0.6244      | 12.9691       |
| Ni <sub>19</sub> | -4.3391                       | -3.2850                       | 1.0542   | -3.8120    | 0.5271      | 13.7842       |
| Ni <sub>20</sub> | -4.4959                       | -3.3269                       | 1.1690   | -3.9114    | 0.5845      | 13.0873       |

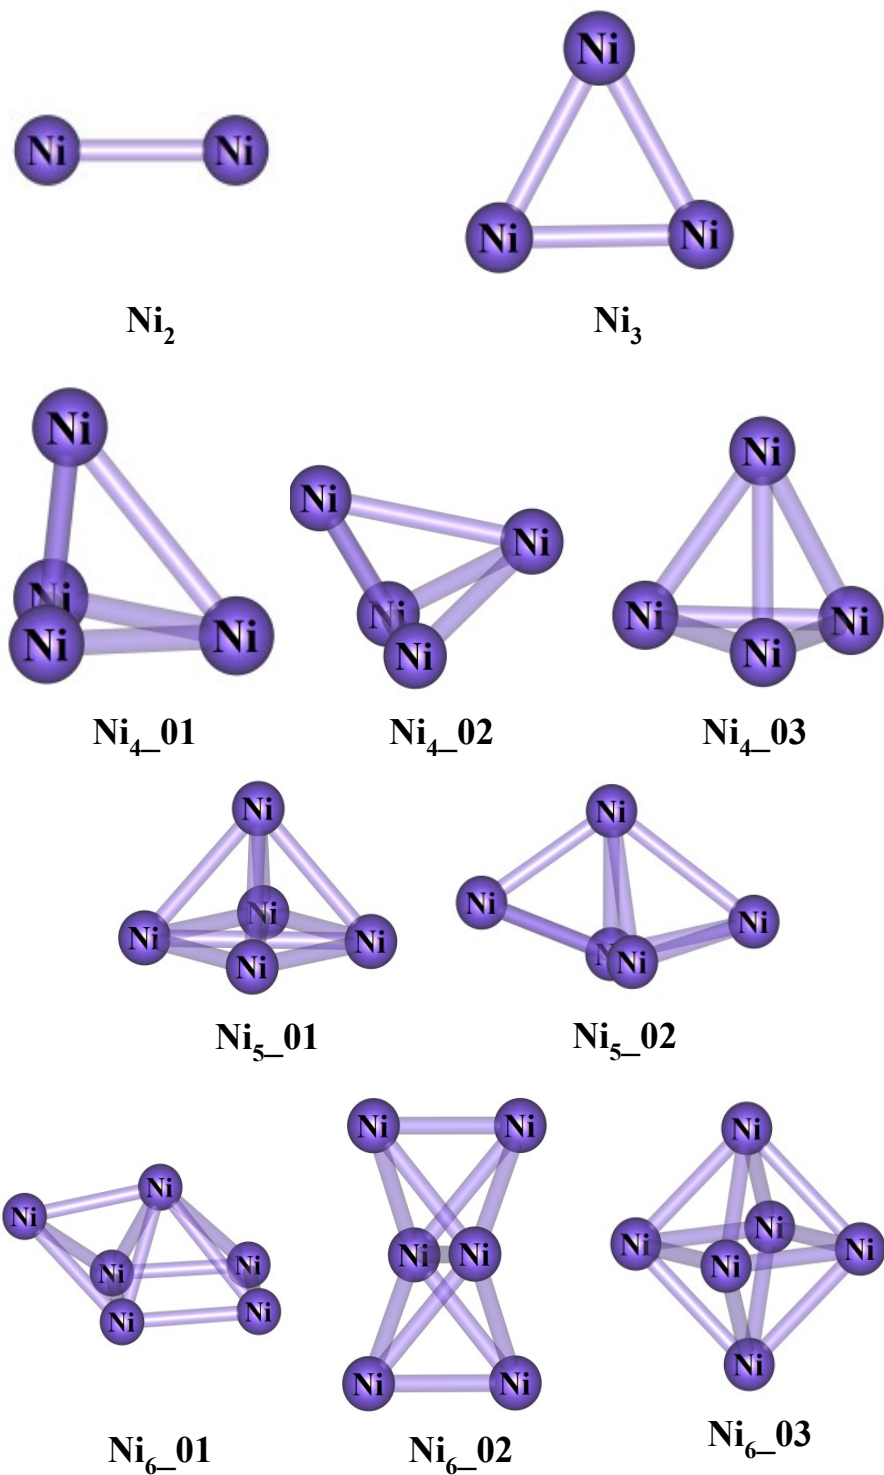

**Figure S1.** Illustration of nickel atomic clusters,  $\text{Ni}_n$  ( $n = 2-6$ ), as determined through the geometric optimization process using the DFT method at B3LYP-GD3BJ/LAN12DZ. The X variable in  $\text{Ni}_n\_X$  name shows different structural isomers for a specific cluster size.

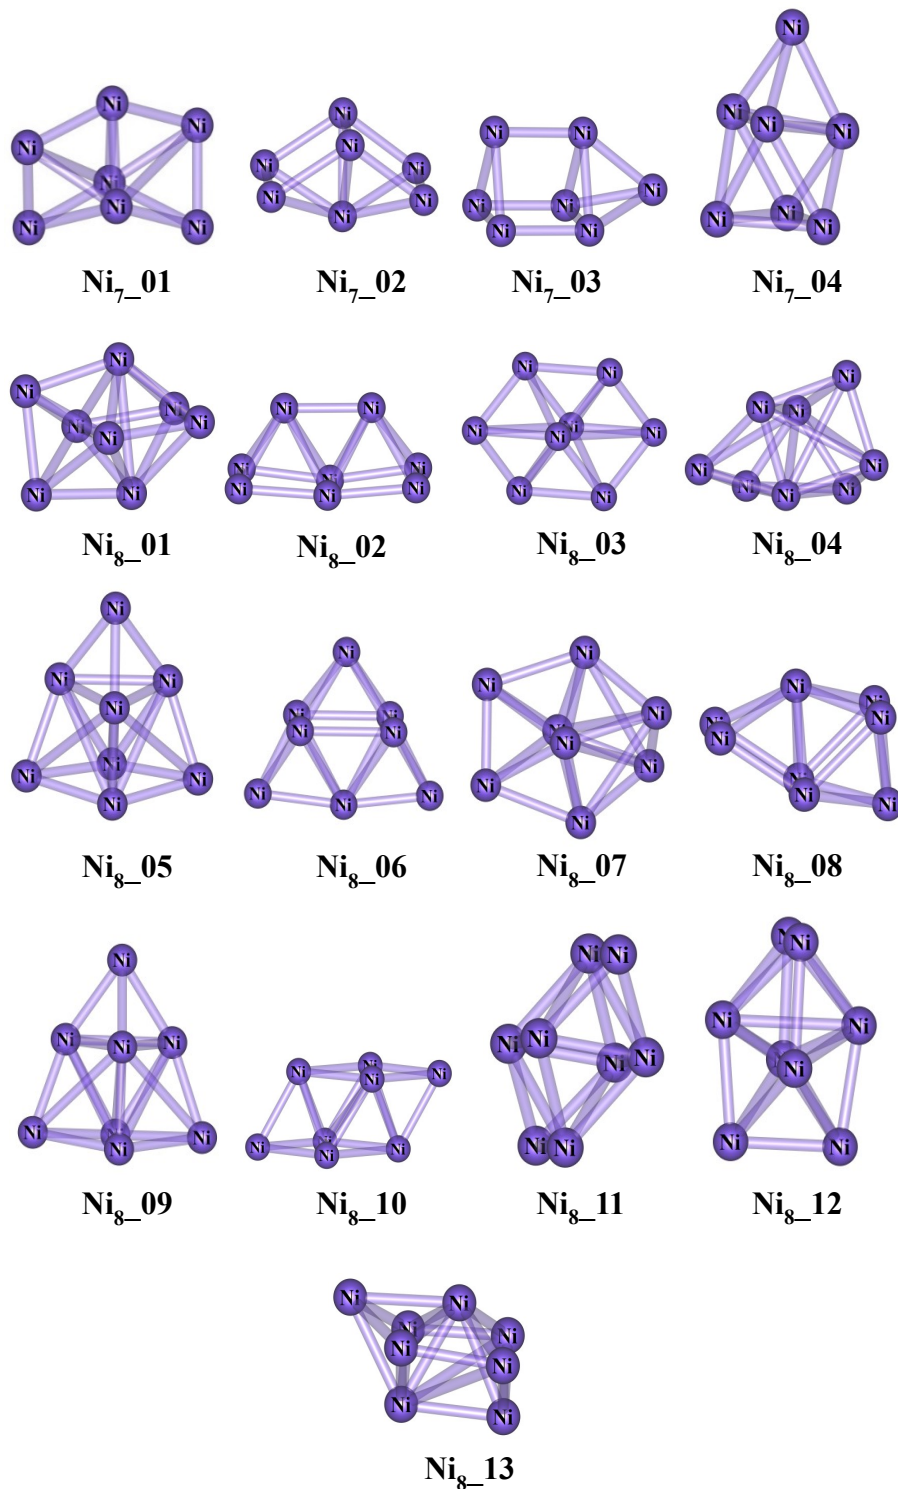

**Figure S2.** Illustration of nickel atomic clusters,  $Ni_n$  ( $n = 7$  and  $8$ ), as determined through the geometric optimization process using the DFT method at B3LYP-GD3BJ/LAN12DZ. The X variable in  $Ni_n$ -X name shows different structural isomers for a specific cluster size.

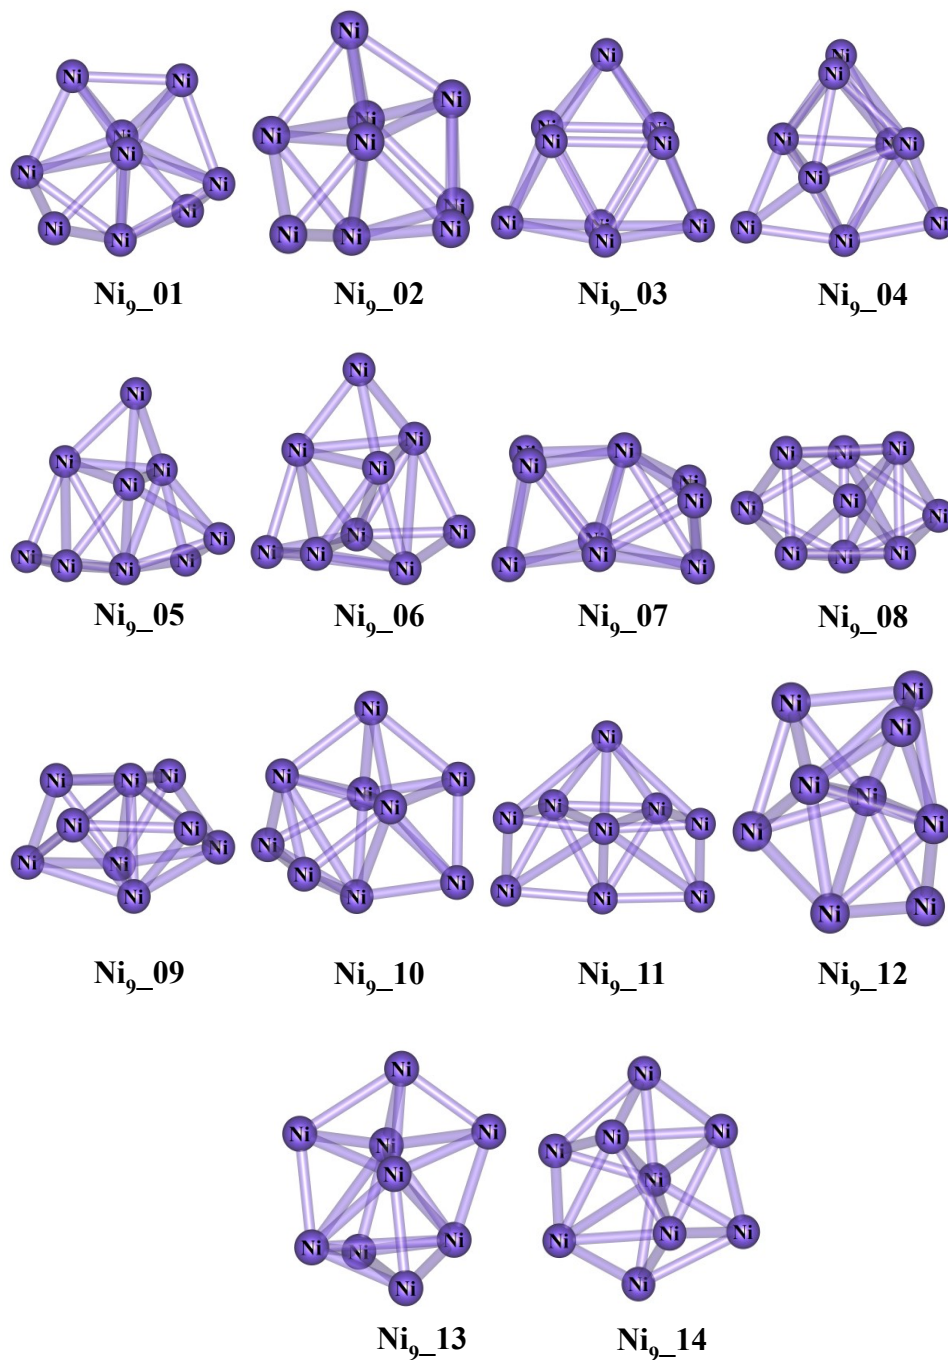

**Figure S3.** Illustration of nickel atomic clusters, Ni<sub>9</sub>, as determined through the geometric optimization process using the DFT method at B3LYP-GD3BJ/LANL2DZ. The X variable in Ni<sub>n</sub>\_X name shows different structural isomers for a specific cluster size.

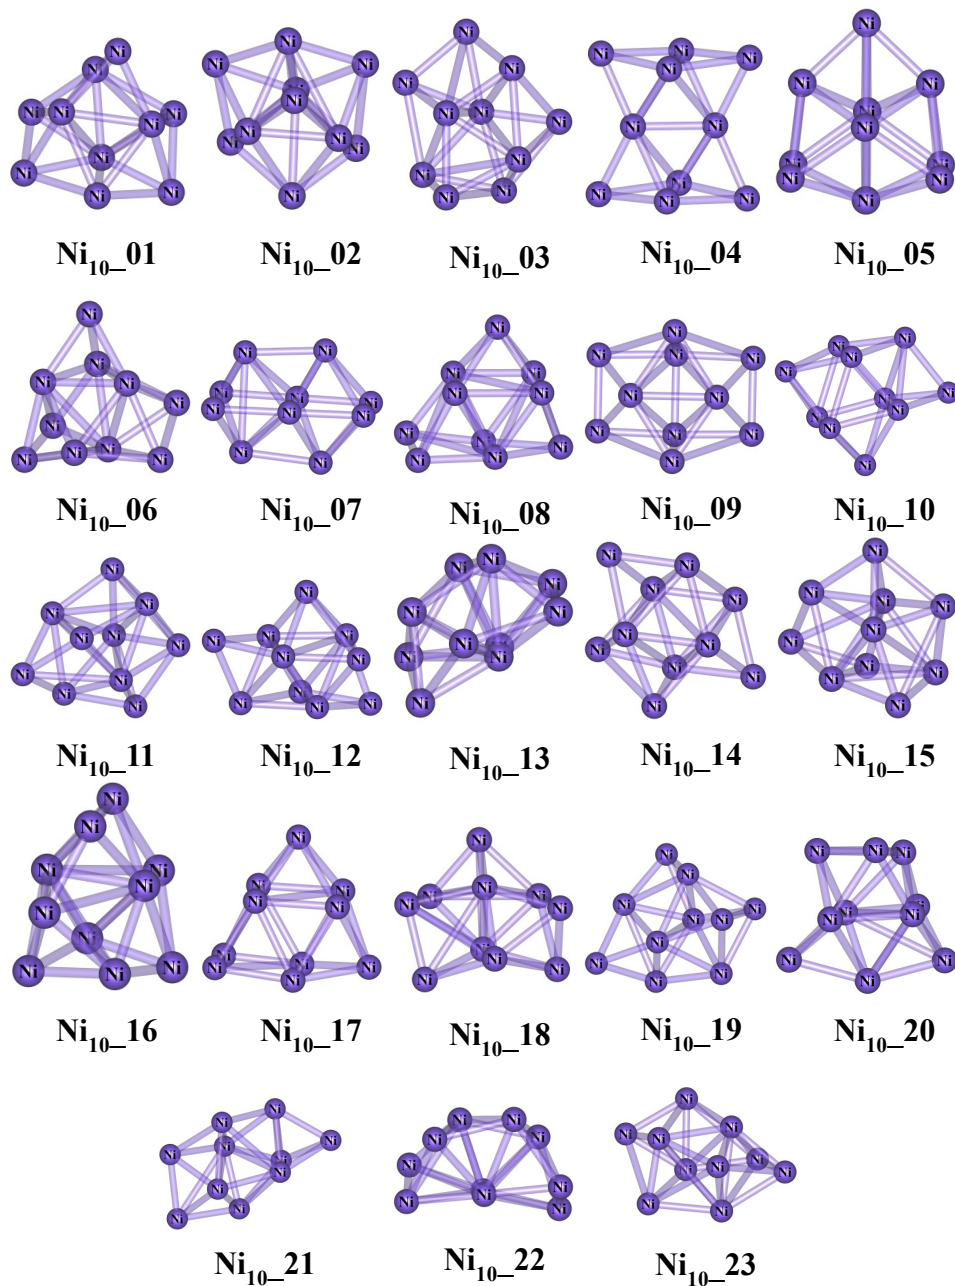

**Figure S4.** Illustration of nickel atomic clusters, Ni<sub>10</sub>, as determined through the geometric optimization process using the DFT method at B3LYP-GD3BJ/LANL2DZ. The X variable in Ni<sub>n</sub>\_X name shows different structural isomers for a specific cluster size.

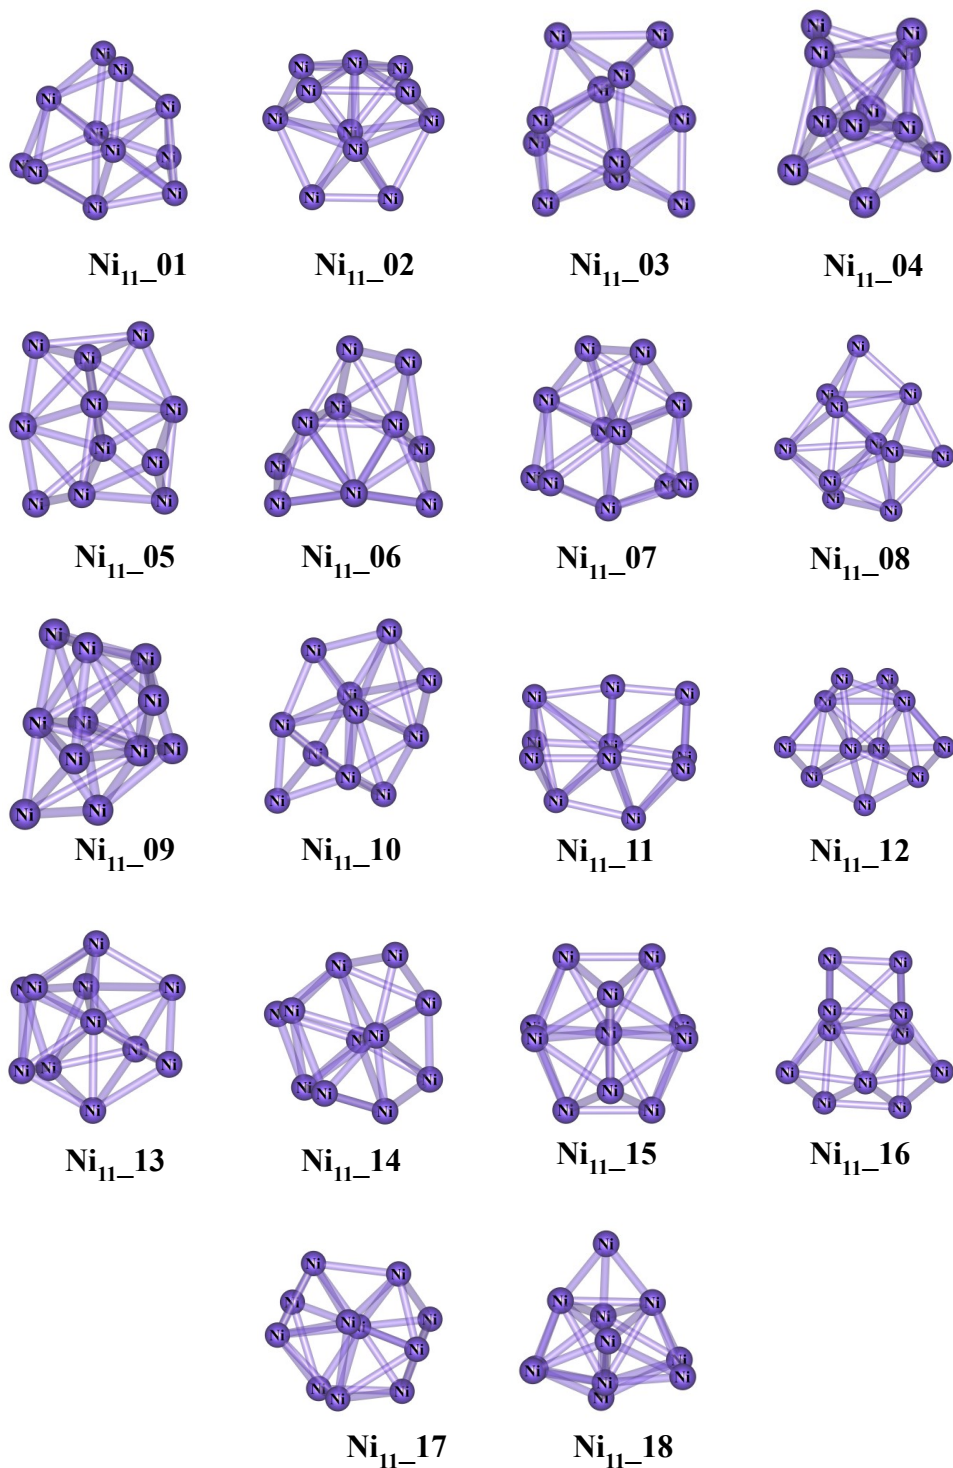

**Figure S5.** Illustration of nickel atomic clusters, Ni<sub>11</sub>, as determined through the geometric optimization process using the DFT method at B3LYP-GD3BJ/LAN12DZ. The X variable in Ni<sub>n</sub>-X name shows different structural isomers for a specific cluster size.

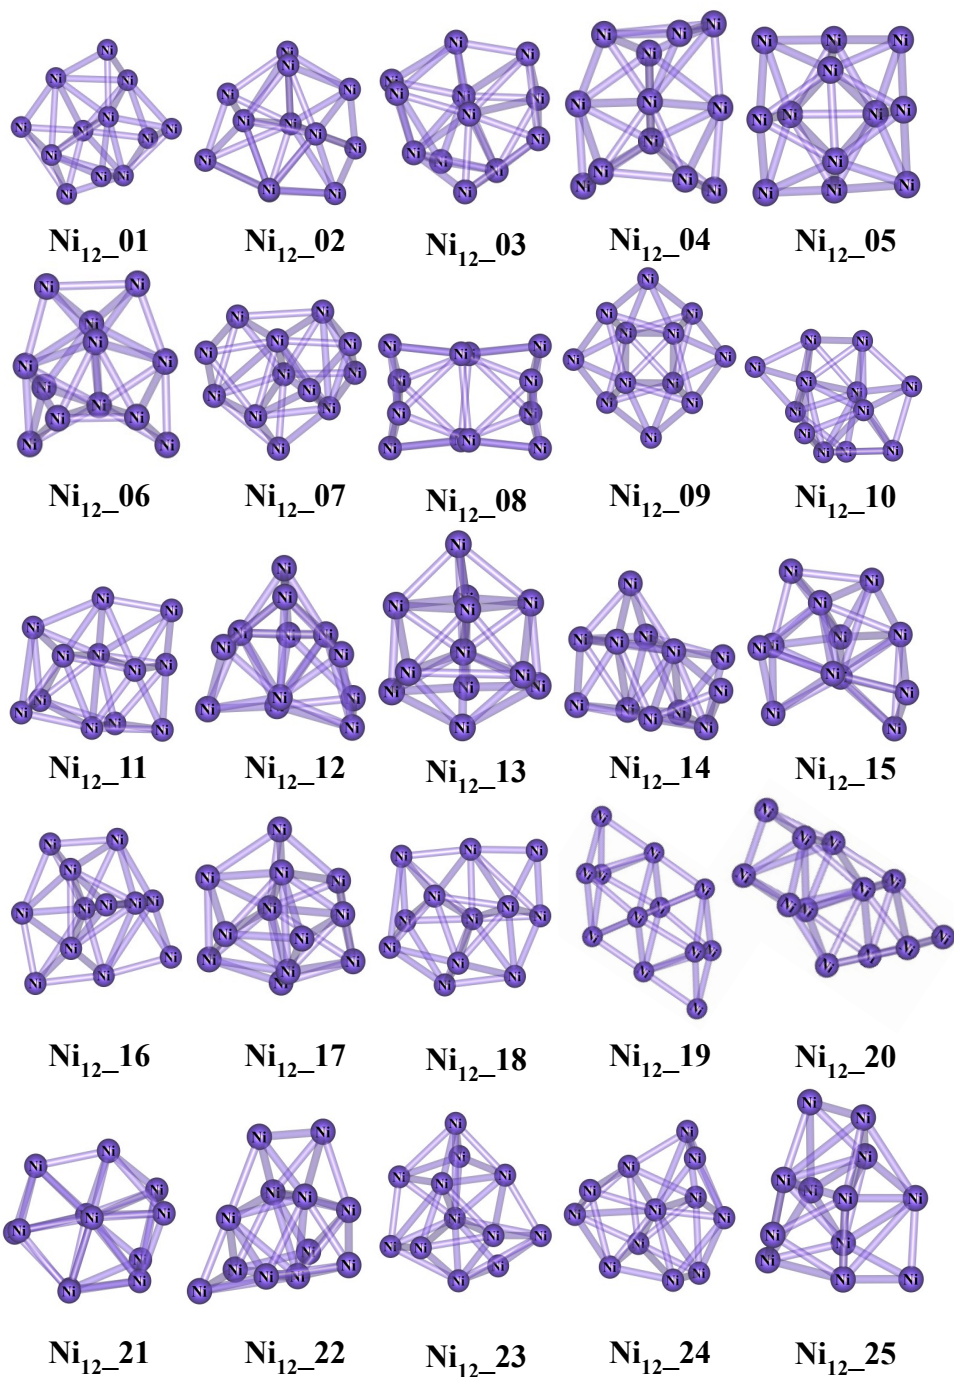

**Figure S6.** Illustration of nickel atomic clusters, Ni<sub>12</sub>, as determined through the geometric optimization process using the DFT method at B3LYP-GD3BJ/LAN12DZ. The X variable in Ni<sub>n</sub>\_X name shows different structural isomers for a specific cluster size.

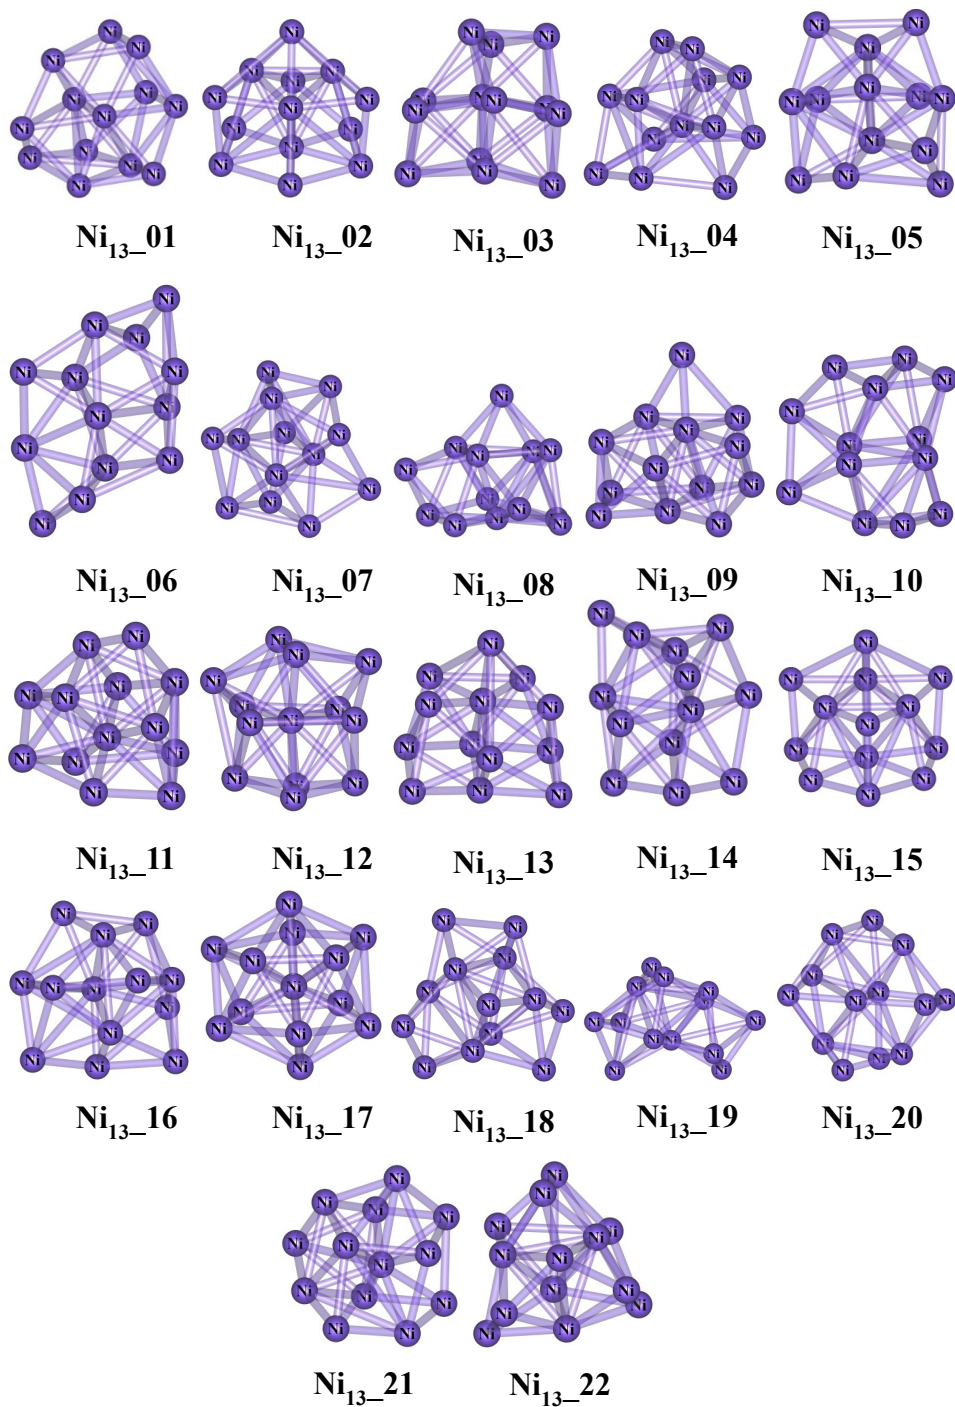

**Figure S7.** Illustration of nickel atomic clusters, Ni<sub>13</sub>, as determined through the geometric optimization process using the DFT method at B3LYP-GD3BJ/LAN12DZ. The X variable in Ni<sub>n</sub>\_X name shows different structural isomers for a specific cluster size.

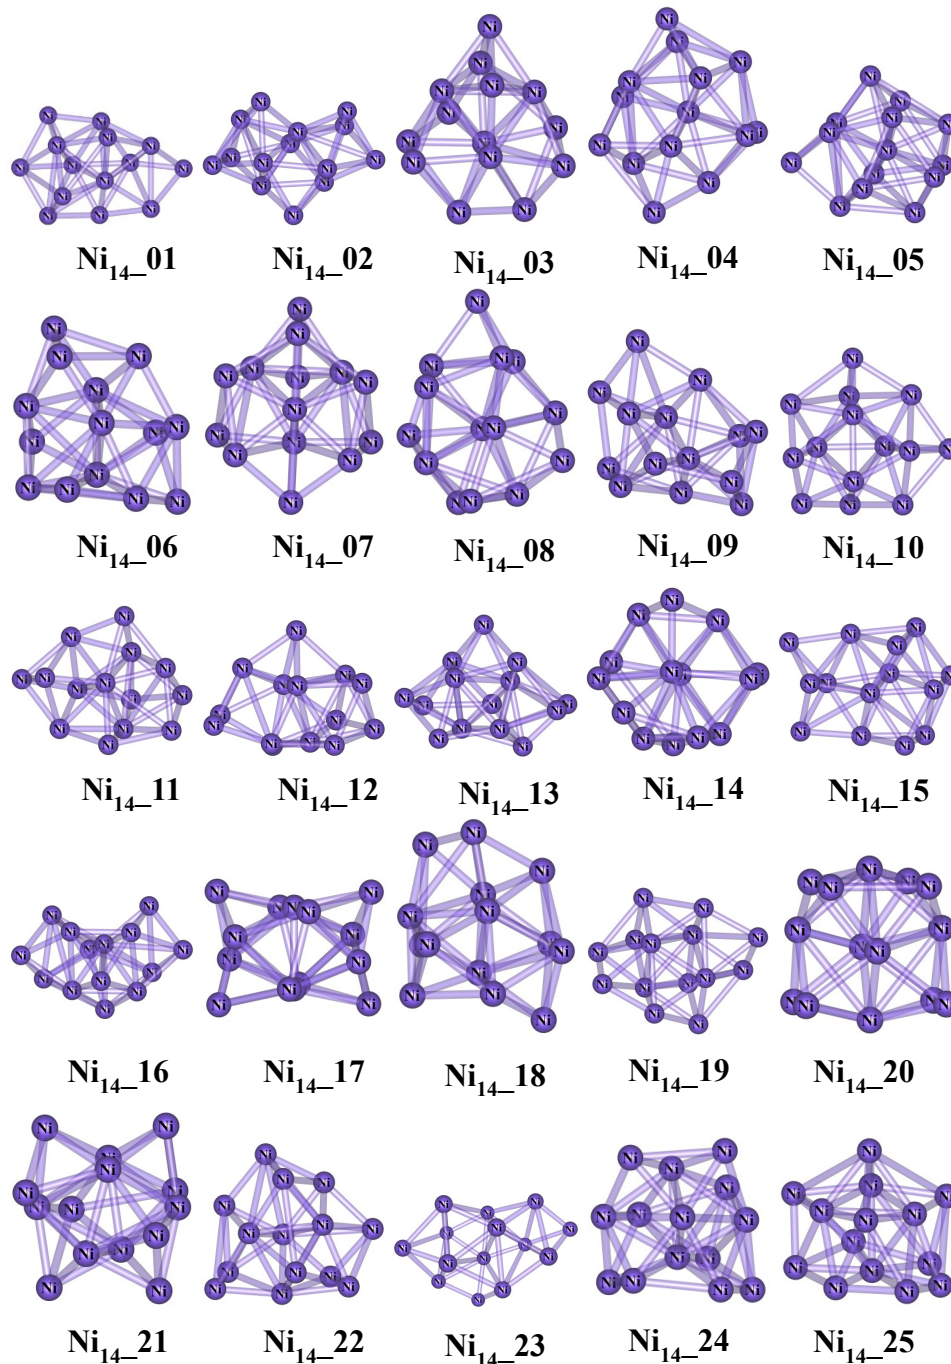

**Figure S8.** Illustration of nickel atomic clusters, Ni<sub>14</sub>, as determined through the geometric optimization process using the DFT method at B3LYP-GD3BJ/LAN12DZ. The X variable in Ni<sub>n</sub>\_X name shows different structural isomers for a specific cluster size.

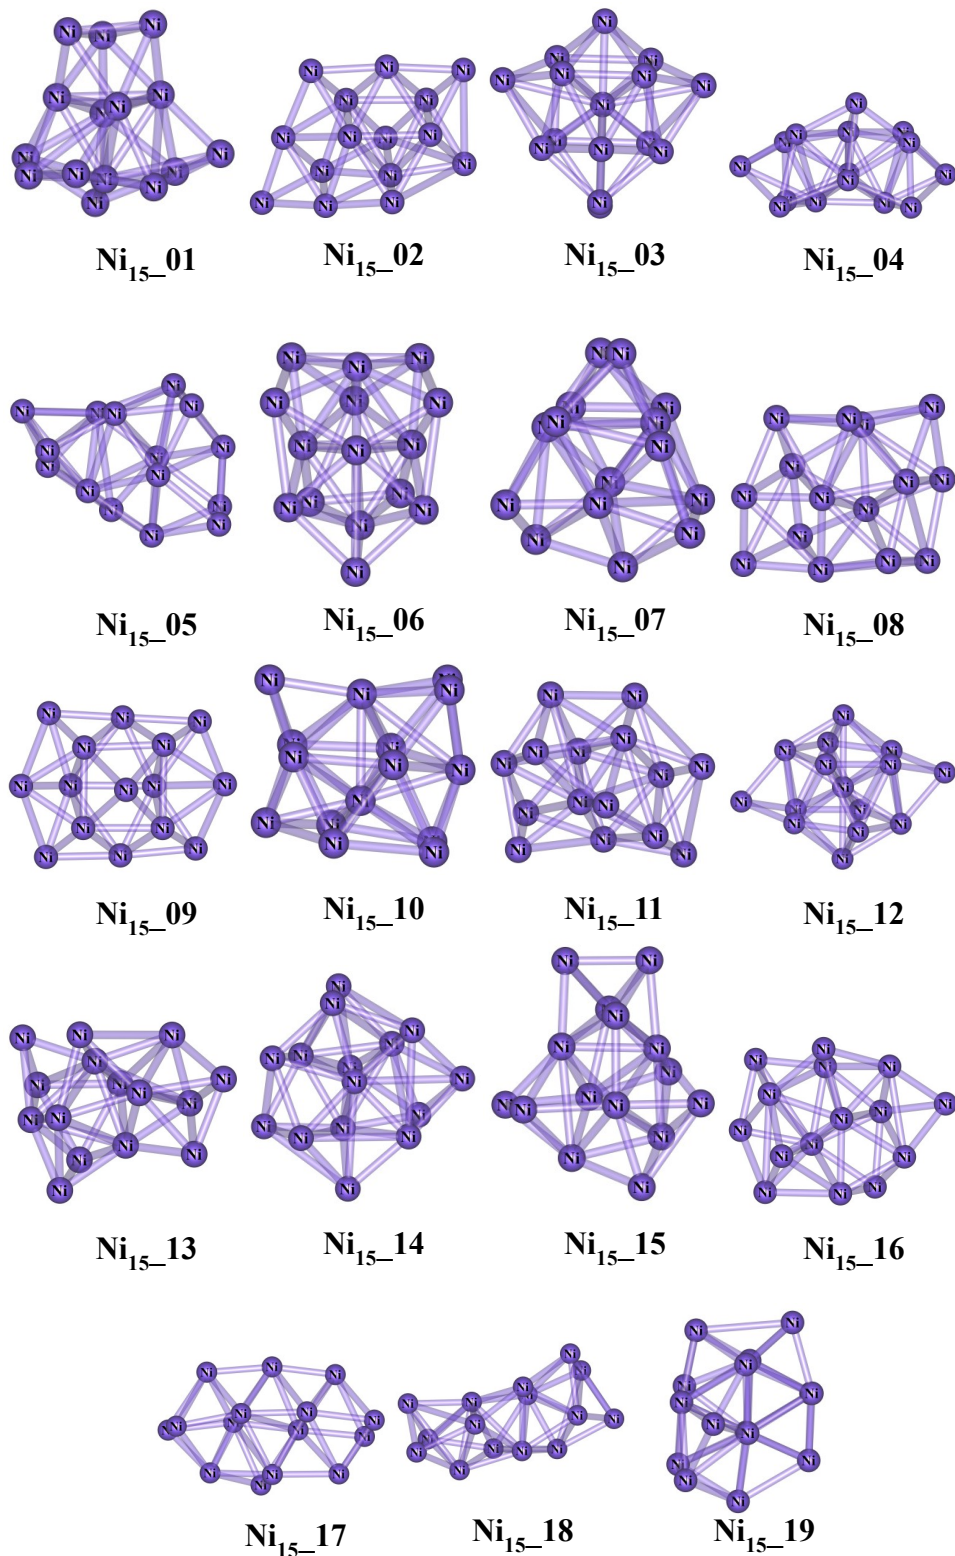

**Figure S9.** Illustration of nickel atomic clusters, Ni<sub>15</sub>, as determined through the geometric optimization process using the DFT method at B3LYP-GD3BJ/LAN12DZ. The X variable in Ni<sub>n</sub>\_X name shows different structural isomers for a specific cluster size.

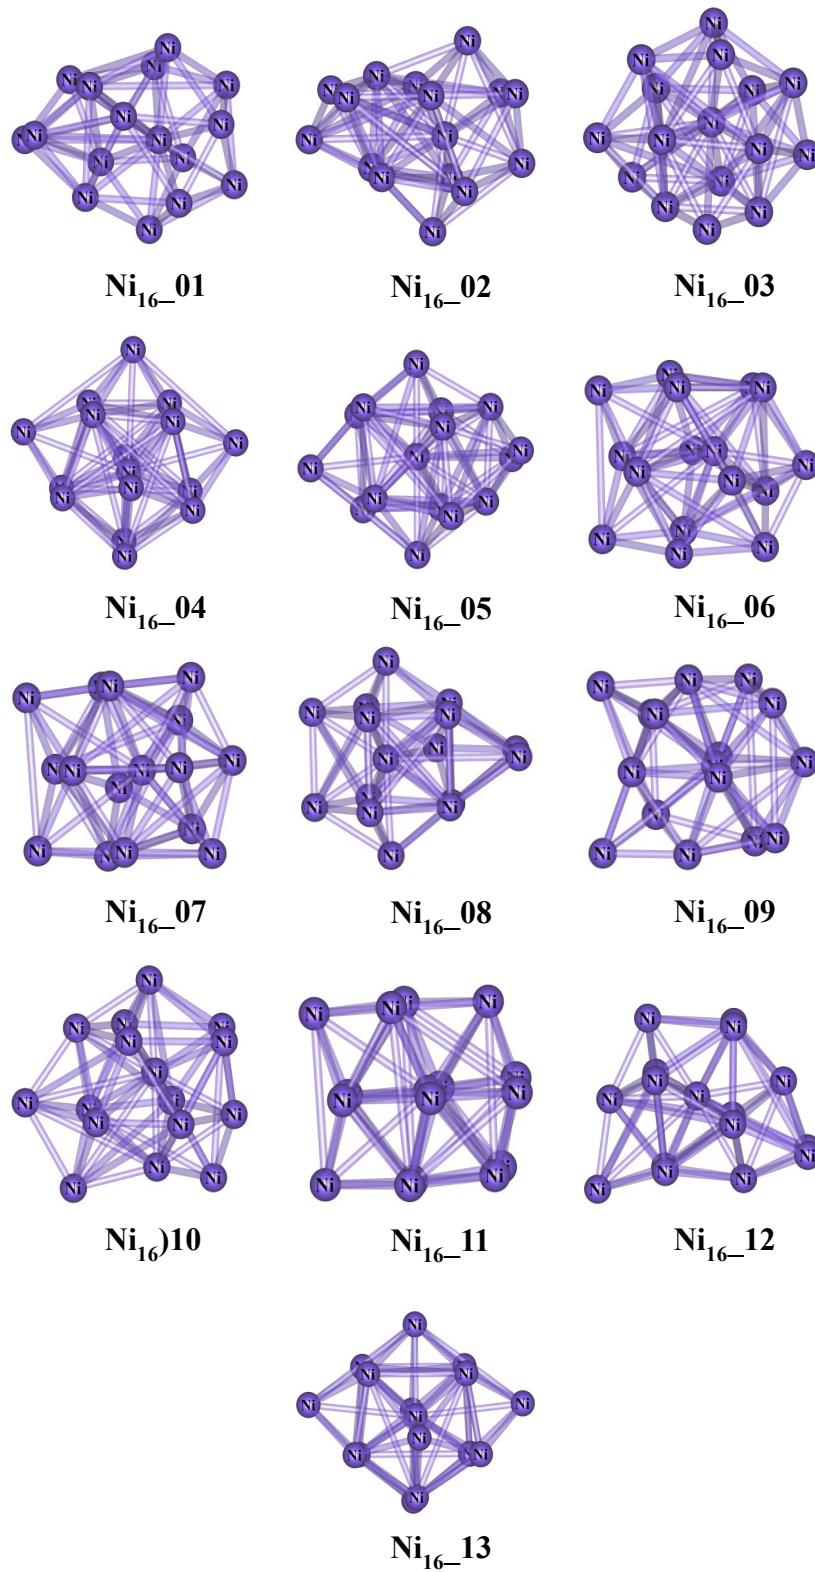

**Figure S10.** Illustration of nickel atomic clusters, Ni<sub>16</sub>, as determined through the geometric optimization process using the DFT method at B3LYP-GD3BJ/LANL2DZ. The X variable in Ni<sub>n</sub>\_X name shows different structural isomers for a specific cluster size.

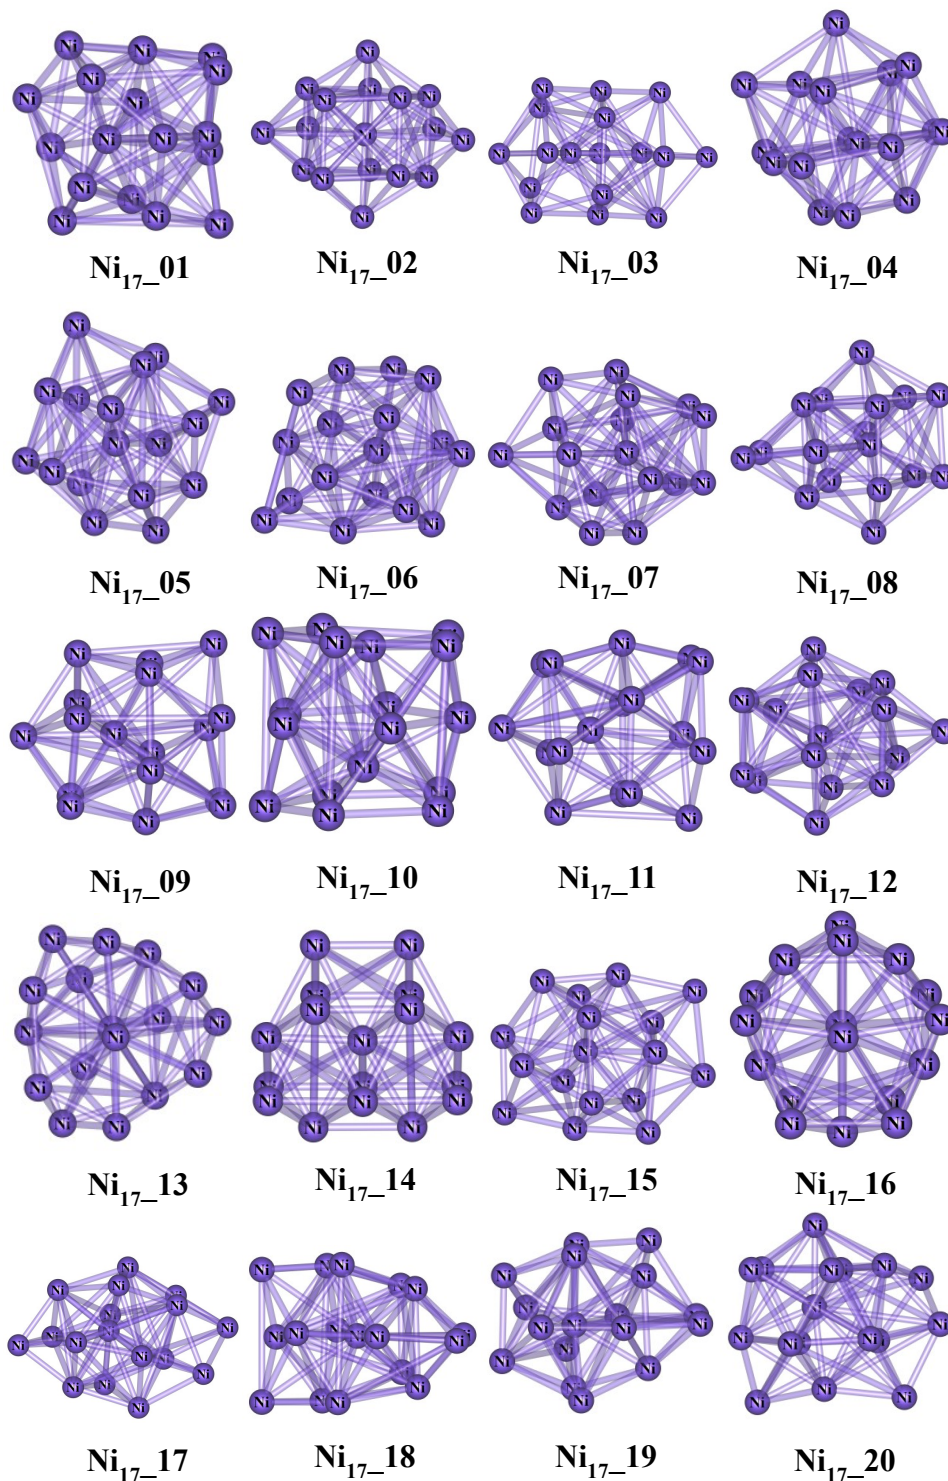

**Figure S11.** Illustration of nickel atomic clusters, Ni<sub>17</sub>, as determined through the geometric optimization process using the DFT method at B3LYP-GD3BJ/LAN12DZ. The X variable in Ni<sub>n</sub>\_X name shows different structural isomers for a specific cluster size.

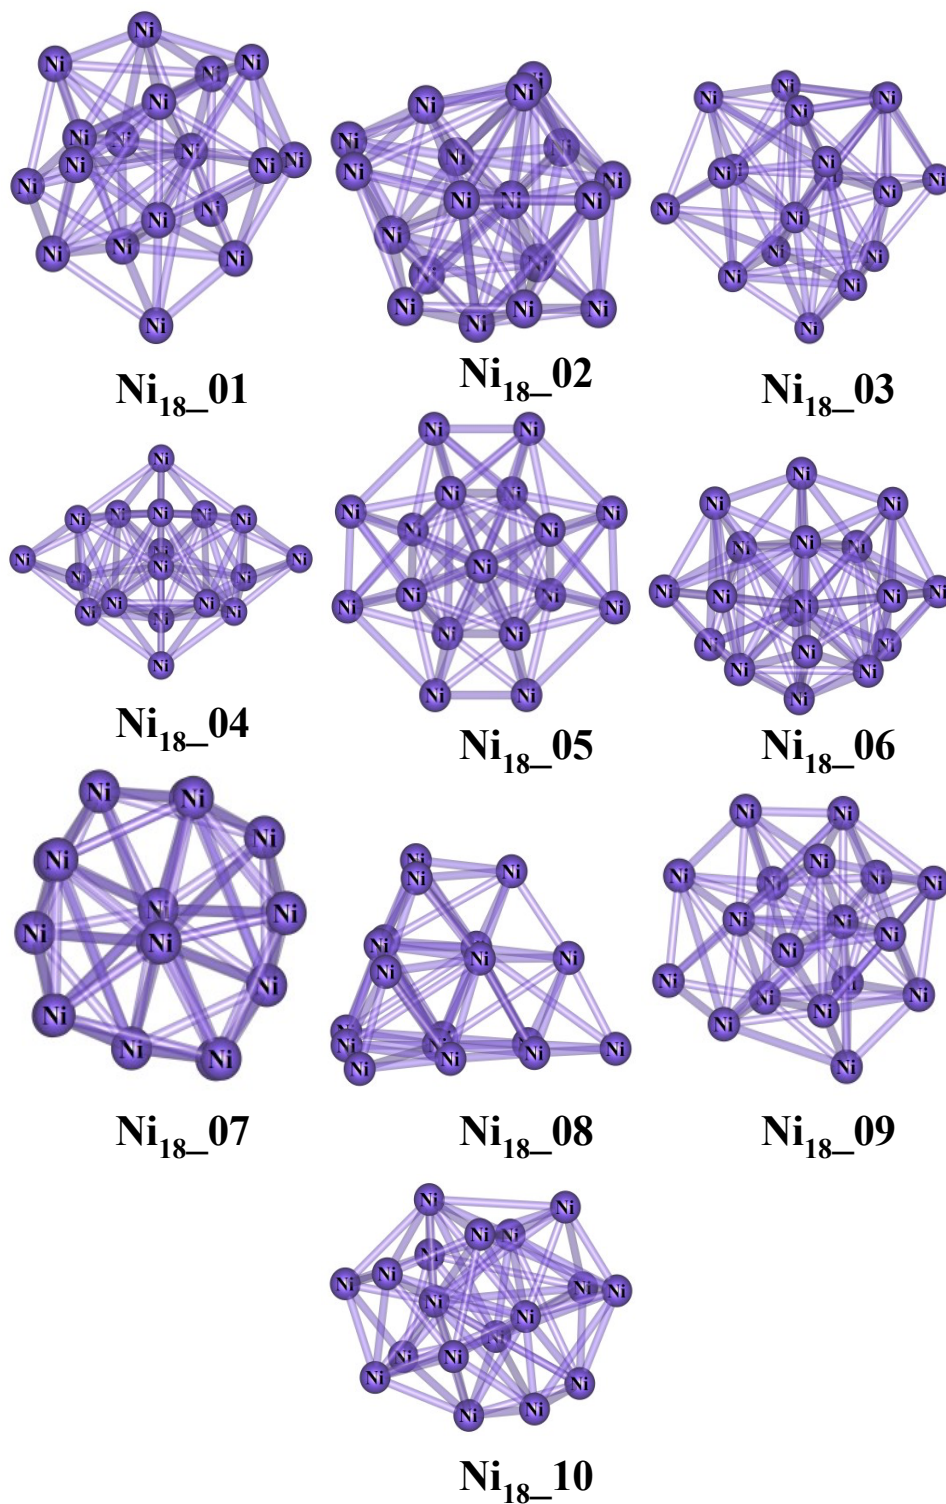

**Figure S12.** Illustration of nickel atomic clusters, Ni<sub>18</sub>, as determined through the geometric optimization process using the DFT method at B3LYP-GD3BJ/LAN12DZ. The X variable in Ni<sub>n</sub>\_X name shows different structural isomers for a specific cluster size.

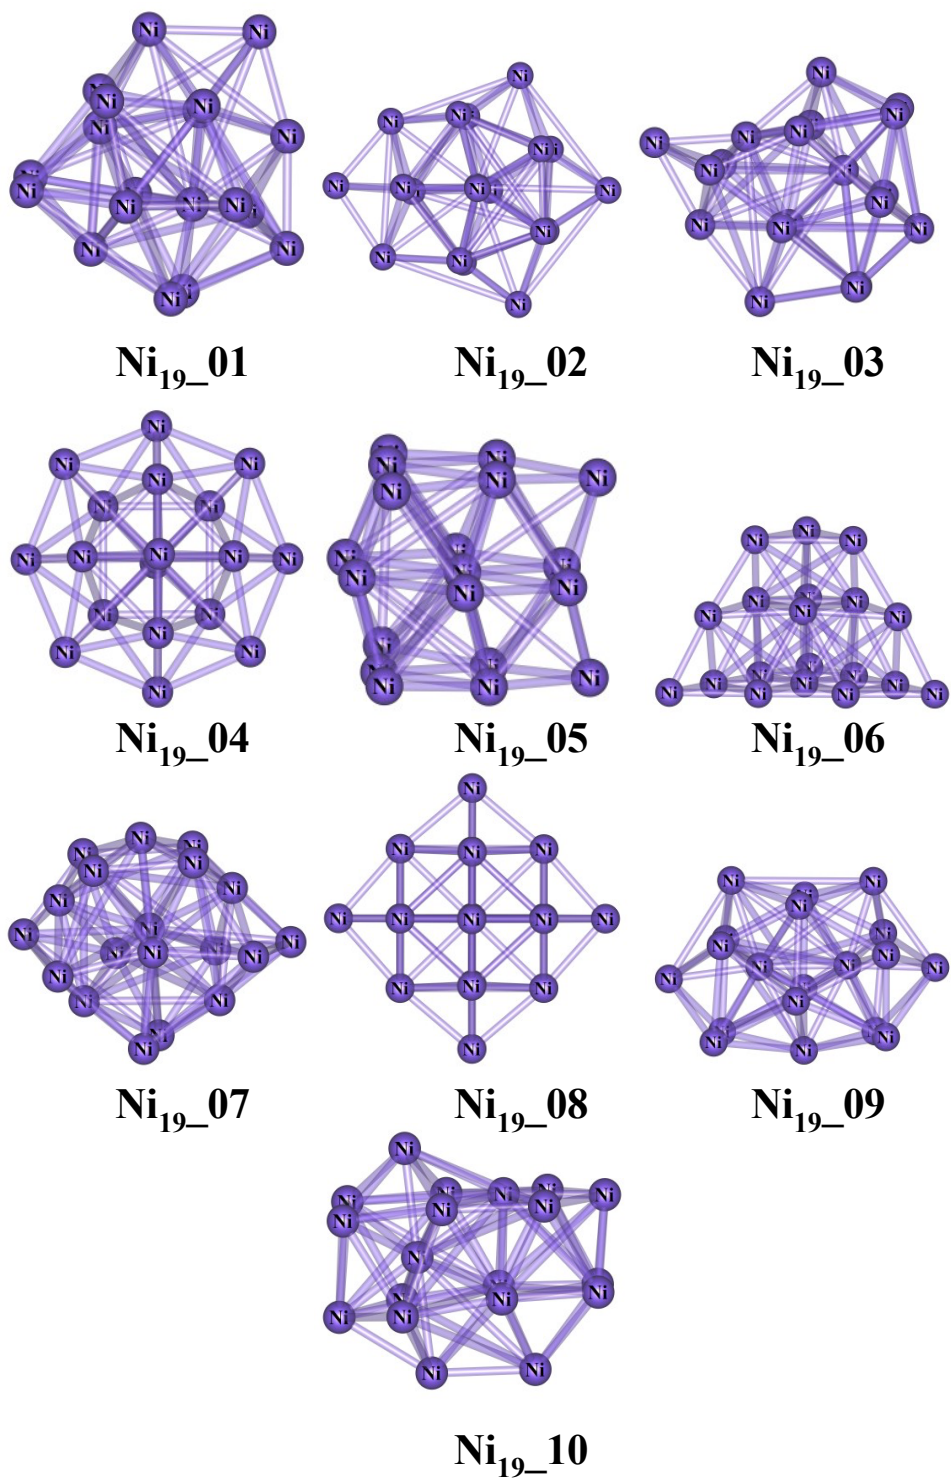

**Figure S13.** Illustration of nickel atomic clusters, Ni<sub>19</sub>, as determined through the geometric optimization process using the DFT method at B3LYP-GD3BJ/LAN12DZ. The X variable in Ni<sub>n</sub>\_X name shows different structural isomers for a specific cluster size.

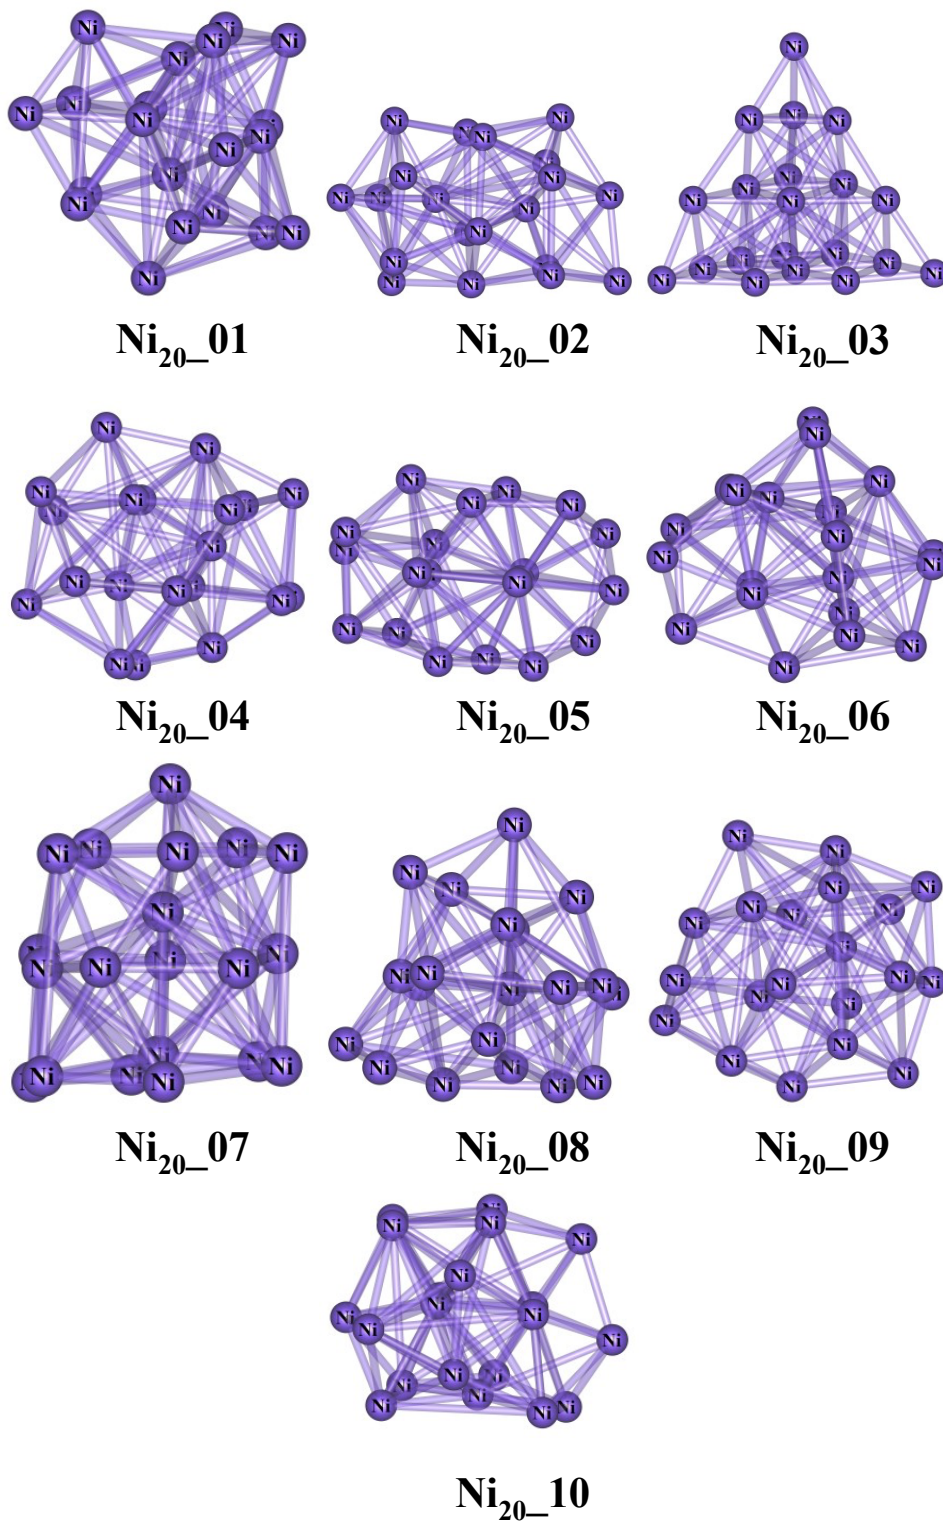

**Figure S14.** Illustration of nickel atomic clusters, Ni<sub>20</sub>, as determined through the geometric optimization process using the DFT method at B3LYP-GD3BJ/LANL2DZ. The X variable in Ni<sub>n</sub>\_X name shows different structural isomers for a specific cluster size.

**Table S7**

The values of adsorption energies ( $E_{\text{ads}}$ ), eV, for the most stable configurations of gas@cluster systems, including CO, CO<sub>2</sub>, CH<sub>4</sub>, NO, NO<sub>2</sub>, NH<sub>3</sub>, H<sub>2</sub>, H<sub>2</sub>O, N<sub>2</sub>, O<sub>2</sub>, and SO<sub>2</sub> gases and Ni<sub>*n*</sub> (*n* = 1-20) atomic clusters. All values are calculated at the B3LYP-GD3BJ/LANI2DZ level of theory

| Systems          | CH <sub>4</sub> | CO      | CO <sub>2</sub> | H <sub>2</sub> | H <sub>2</sub> O | N <sub>2</sub> | NH <sub>3</sub> | NO       | NO <sub>2</sub> | O <sub>2</sub> | SO <sub>2</sub> |
|------------------|-----------------|---------|-----------------|----------------|------------------|----------------|-----------------|----------|-----------------|----------------|-----------------|
| Ni <sub>1</sub>  | -0.8248         | -3.1672 | -1.7999         | -1.4212        | -1.5371          | -2.2295        | -2.0504         | -2.9284  | -3.8216         | -3.1881        | -3.1346         |
| Ni <sub>2</sub>  | -0.3533         | -0.6466 | -0.7846         | -0.3241        | -1.0973          | -1.2388        | -3.3357         | -3.1495  | -3.8666         | -2.3765        | -4.3741         |
| Ni <sub>3</sub>  | -0.3245         | -2.0049 | -1.3502         | -0.3405        | -0.9662          | -1.1305        | -1.2628         | -4.0465  | -4.4875         | -3.8219        | -3.7161         |
| Ni <sub>4</sub>  | -0.4413         | -2.5257 | -1.9774         | -0.5436        | -1.0192          | -1.7539        | -1.1005         | -4.8069  | -5.8588         | -4.6103        | -5.2647         |
| Ni <sub>5</sub>  | -0.4518         | -2.6239 | -1.9392         | -0.5631        | -1.1143          | -1.5423        | -1.3478         | -5.4748  | -6.5831         | -4.2077        | -5.0711         |
| Ni <sub>6</sub>  | -0.3862         | -2.3213 | -0.7975         | -0.5464        | -1.0496          | -1.5055        | -1.5037         | -6.2404  | -7.5469         | -4.3682        | -4.5238         |
| Ni <sub>7</sub>  | -0.3040         | -0.6714 | -1.8308         | -0.5376        | -0.9571          | -1.5543        | -1.4451         | -6.6696  | -8.0531         | -5.0350        | -4.5561         |
| Ni <sub>8</sub>  | -0.3325         | -0.6004 | -2.1480         | -0.2226        | -0.9474          | -1.2172        | -1.2944         | -7.1439  | -8.5899         | -4.9095        | -4.4911         |
| Ni <sub>9</sub>  | 0.0847          | -2.1557 | -1.5543         | -0.3090        | -0.8336          | -1.4433        | -1.4617         | -7.9726  | -8.7458         | -4.9241        | -5.0367         |
| Ni <sub>10</sub> | -0.3746         | -2.1269 | -1.7093         | -0.1497        | -0.5062          | -1.1239        | -1.4525         | -8.0232  | -9.7247         | -4.8957        | -4.5955         |
| Ni <sub>11</sub> | 0.1548          | -0.6376 | -1.2772         | -0.0171        | -0.7428          | -1.0707        | -0.4546         | -8.4526  | -9.8685         | -4.3004        | -5.0351         |
| Ni <sub>12</sub> | -0.2812         | -2.4789 | -1.9660         | -0.2608        | -0.8549          | -1.3725        | -1.3720         | -9.1154  | -10.4025        | -5.0977        | -4.9884         |
| Ni <sub>13</sub> | 0.1207          | -0.4941 | -1.9666         | 0.1131         | -0.0631          | -1.0408        | -1.4545         | -8.4136  | -10.3157        | -4.7888        | -5.1764         |
| Ni <sub>14</sub> | -0.3506         | -1.4181 | -0.9868         | 0.3213         | -1.0171          | -0.7697        | -0.6686         | -8.9889  | -15.3510        | -4.9962        | -4.9929         |
| Ni <sub>15</sub> | 0.1826          | -0.6395 | -0.7508         | -0.3247        | -0.8009          | -0.8178        | -0.2179         | -10.4148 | -12.3606        | -4.9767        | -5.2583         |
| Ni <sub>16</sub> | -0.3000         | -1.7097 | -1.9762         | -0.2155        | -0.7265          | -0.9395        | -0.9898         | -11.6093 | -18.0072        | -5.0901        | -5.7747         |
| Ni <sub>17</sub> | -0.4152         | -2.3567 | -1.5509         | -0.0980        | -1.2022          | -1.1455        | -1.2682         | -15.8097 | -19.0045        | -4.4218        | -5.2970         |
| Ni <sub>18</sub> | 0.2359          | -2.0099 | -1.1867         | 0.0744         | -0.3656          | -0.8083        | -1.1213         | -16.9561 | -19.5259        | -4.0357        | -6.8806         |
| Ni <sub>19</sub> | -0.4939         | -1.3140 | -0.6107         | 0.9029         | -0.1683          | -0.3802        | 0.1101          | -17.8105 | -20.3053        | -4.7212        | -5.2793         |
| Ni <sub>20</sub> | -0.2276         | -0.9195 | -1.8958         | -0.2404        | -1.1573          | -1.3889        | -1.4236         | -18.1721 | -19.1353        | -5.4238        | -7.2063         |
